1 **Functional maturation of human neural stem cells in a 3D bioengineered brain model**  
2 **enriched with fetal brain-derived matrix**

3 Disha Sood<sup>1</sup>, Dana M. Cairns<sup>1</sup>, Jayanth M. Dabbi<sup>1</sup>, Charu Ramakrishnan<sup>2</sup>, Karl Deisseroth<sup>2</sup>, Lauren D. Black III<sup>1</sup>,  
4 Sabato Santaniello<sup>3</sup>, David L. Kaplan<sup>1\*</sup>

5

6 \*Corresponding author

7 David L. Kaplan

8 Science & Technology Center

9 Room 251

10 Tufts University

11 Medford, MA 02155, USA

12 Tel: 617-627-3251

13 Email: david.kaplan@tufts.edu

14

15 **Abstract**

16 Brain extracellular matrix (ECM) is often overlooked *in vitro* brain tissue models, despite its  
17 instructive roles during development. Using developmental stage-sourced brain ECM in reproducible 3D  
18 bioengineered culture systems, we demonstrate enhanced functional differentiation of human induced  
19 neural stem cells (hiNSCs) into healthy neurons and astrocytes. Particularly, fetal brain tissue-derived  
20 ECM supported long-term maintenance of differentiated neurons, demonstrated by morphology, gene  
21 expression and secretome profiling. Astrocytes were evident within the second month of differentiation,  
22 and reactive astrogliosis was inhibited in brain ECM-enriched cultures when compared to unsupplemented  
23 cultures. Functional maturation of the differentiated hiNSCs within fetal ECM-enriched cultures was  
24 confirmed by calcium signaling and unsupervised cluster analysis. Additionally, the study identified  
25 native biochemical cues in decellularized ECM with notable comparisons between fetal and adult brain-  
26 derived ECMs. The development of novel brain-specific biomaterials for generating mature *in vitro* brain  
27 models provides an important path forward for interrogation of neuron-glia interactions.

28 **KEYWORDS:** *brain extracellular matrix, human neural stem cells, neurons, astrocytes, tissue*  
29 *engineering, differentiation, real-time tracking*

30

31

32

33

34

35

36

37

## 38 **Introduction**

39 Many brain physiological and pathological features are human-specific, making it difficult to  
40 extrapolate results from animal models, and thus driving the need for innovative human cell-based 3D *in vitro*  
41 brain tissue cultures to investigate neurological disorders. Additionally, many neurodevelopmental and  
42 neurodegenerative disorders are polygenic with multiple syndromic and non-syndromic forms, some of  
43 which are of unknown genetic etiology and thus challenging to investigate using animal models (Avior,  
44 Sagi, & Benvenisty, 2016). Previous *in vitro* models of neurological disorders using human induced  
45 pluripotent stem cells (hiPSCs) or human neural stem cells (hNSCs) have mainly involved monolayer 2D  
46 cultures that do not recapitulate physiological cell phenotype, signaling, and drug sensitivity due to the  
47 lack of high cell densities, connectivity in 3D networks, and relevant cell-cell and cell-ECM interactions  
48 (de la Torre-Ubieta, Won, Stein, & Geschwind, 2016; Quadrato, Brown, & Arlotta, 2016). Recent  
49 advances in 3D organoid and spheroid-based systems have been extremely useful for studies of normal  
50 brain development, such as cortical layering/interneuron migration, and for neurodevelopmental disorders  
51 such as microcephaly, lissencephaly, and autism (Bagley, Reumann, Bian, Levi-Strauss, & Knoblich,  
52 2017; Birey et al., 2017; Camp et al., 2015; Giandomenico & Lancaster, 2017; Lancaster et al., 2013; Luo  
53 et al., 2016; Mariani et al., 2015; A. M. Pasca et al., 2015; Quadrato et al., 2017; Sloan et al., 2017).  
54 Despite the variety of approaches there are only a few examples of 3D *in vitro* brain-like tissue models  
55 that exhibit neuronal maturity and co-differentiation into glial cell types (Marton et al., 2019; A. M. Pasca  
56 et al., 2015; Sloan et al., 2017). Also, most of these models were associated with significant limitations  
57 including slow maturation into neuronal supporting cell types, such as astrocytes, and/or necrosis at longer  
58 time points of cultivation *in vitro* (Quadrato et al., 2016; Velasco et al., 2019). This maturation and cell-  
59 cell interactions are key for modeling synaptogenesis and functions during later postnatal developmental  
60 stages and for revealing the molecular basis for many diseased states, particularly neurodegenerative

61 disorders where neuron-glia interactions are dysfunctional (Y. H. Kim et al., 2015; Lian & Zheng, 2016;  
62 Rama Rao & Kielian, 2015; Salmina, 2009). Many of these 3D brain-like tissue models are also limited  
63 in terms of reproducibility, and compartmentalization related to the introduction of microglia and  
64 vasculature, as well as for sampling and control of nutrient transport into and out of the tissue systems.

65 A common limitation of current 3D *in vitro* brain models is that the ECM content is often not  
66 considered in detail, even though brain ECM is dynamic during development and plays a crucial role in  
67 cell signaling and homeostasis (Zimmermann & Dours-Zimmermann, 2008). The ‘dynamic reciprocity’  
68 model was proposed in the 1980s, which suggested that ECM guides gene expression and individual  
69 components of ECM have an instructive role in directing tissue-specific development (Bissell, Hall, &  
70 Parry, 1982). Despite these roles, most 3D brain tissue models use Matrigel as the major ECM component  
71 and/or soluble bioactive factors to induce differentiation. Matrigel is a mouse sarcoma-derived basement  
72 membrane matrix that lacks many physiologically-relevant biochemical cues involved in brain  
73 development and maintenance, including several glycoproteins and proteoglycans (Bandtlow &  
74 Zimmermann, 2000; Hughes, Postovit, & Lajoie, 2010; Miyata & Kitagawa, 2017). The human brain  
75 ECM constitutes about 20-40% of the brain volume during development and adulthood, is highly  
76 organized, and has unique traits in composition when compared to the ECM of other tissues (Zimmermann  
77 & Dours-Zimmermann, 2008). Moreover, during development, ECM guides the compartmentalization of  
78 functional brain microdomains, and thus contributes to the sophisticated architecture and function of the  
79 brain (Dityatev, Seidenbecher, & Schachner, 2010). Such native ECM signals are particularly important  
80 for differentiation and complete maturation of neural progenitor/stem cells (Hoshiba et al., 2016).

81 The impact of adult brain-derived ECM on cell differentiation, gelation kinetics and mechanical  
82 properties has been studied in isolation (De Waele et al., 2015; DeQuach et al., 2010; Medberry et al.,  
83 2013); however, the study of composite, scaffold-based 3D *in vitro* systems to investigate the bioactivity

84 of ECM from different developmental stages over long-term differentiation of human induced neural stem  
85 cells (hiNSCs) into both mature neurons and astrocytes is lacking. Astrocytes respond to soluble factors  
86 and also influence their environment through the secretion of ECM molecules, particularly chondroitin  
87 sulfate proteoglycans (CSPGs) that vary with mature/resting versus reactive astrocytes (Avram,  
88 Shaposhnikov, Buiu, & Mernea, 2014; Lian & Zheng, 2016; Wiese, Karus, & Faissner, 2012). Therefore,  
89 preventing reactive astrogliosis, measured by consistently high CSPG release, in 3D *in vitro* brain models  
90 is critical in order to maintain neuronal health and functional synapses (Krencik, van Asperen, & Ullian,  
91 2017; Yu, Wang, Katagiri, & Geller, 2012).

92 We hypothesized that the use of native brain-derived ECM for brain-relevant biochemical cues,  
93 in combination with a tissue engineered approach to design brain-specific tissue constructs would promote  
94 improved differentiation of stem cells; as well as address the need for reproducibility, tunability for  
95 compartmentalization/sampling and accelerated maturation of the cells into neurons and glia. Many ECM  
96 proteins are conserved across species (Hynes, 2012), thus porcine brain-derived ECM was used towards  
97 the differentiation of hNSCs. In the current study, we investigated the effects of brain-derived ECM from  
98 two different developmental stages (fetal versus adult) on the differentiation of hiNSCs (Cairns et al.,  
99 2016) into mature neurons and healthy astrocytes, when cultured within relevant environmental cues  
100 (biochemical factors and 3D topology) (**Schematic 1**). hiNSCs were cultured in bioengineered silk protein  
101 scaffold-based 3D tissue constructs infused with either collagen type I (CLG1, previously shown to be  
102 compatible with brain cells (Chwalek, Tang-Schomer, Omenetto, & Kaplan, 2015)) or hyaluronic acid  
103 (HA, a brain ECM component (Charles, Holland, Gilbertson, Glass, & Kettenmann, 2012; Wiranowska  
104 & Rojiani, 2011)) hydrogels supplemented with native brain-derived ECM (fetal or adult).

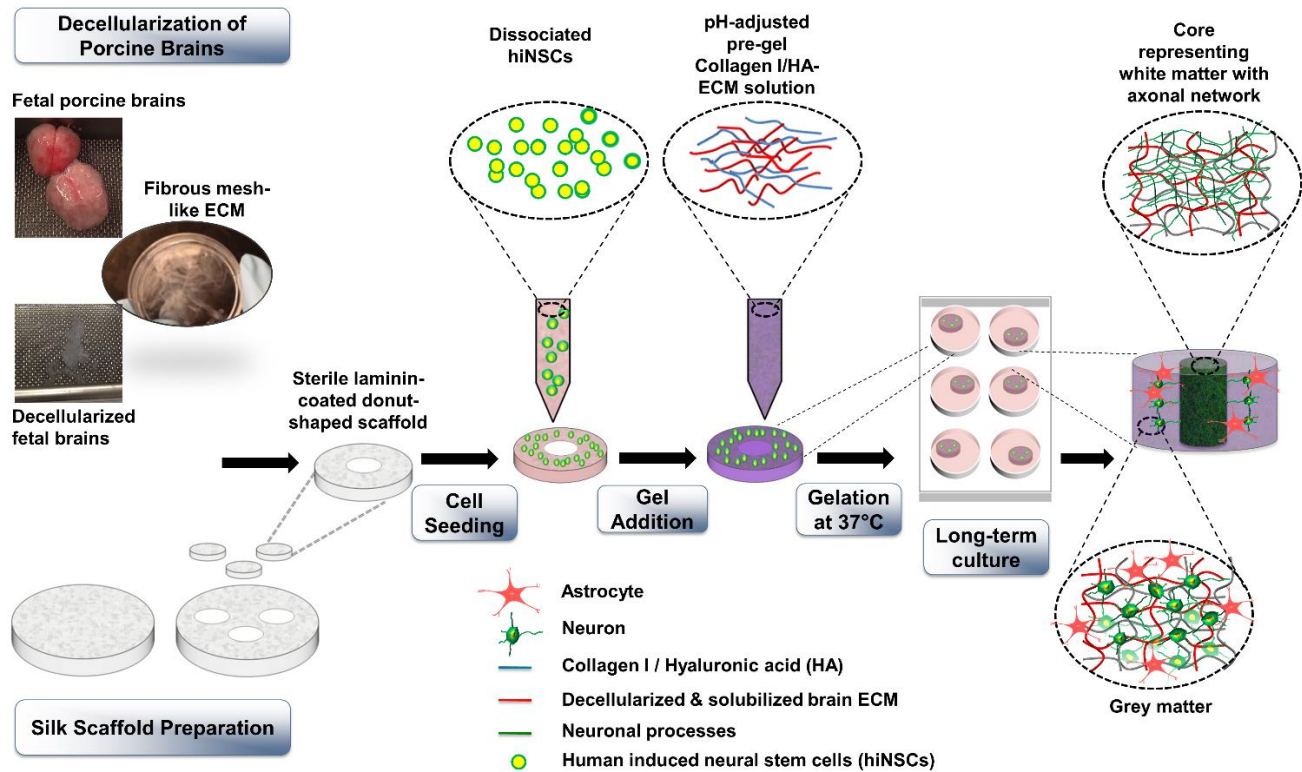

105

106 **Schematic 1: Culture of human induced neural stem cells in 3D *in vitro* bioengineered brain tissue constructs infused**  
 107 **with decellularized brain ECM-collagen I/ hyaluronic acid (HA) hydrogel.** The process starts with decellularization of  
 108 porcine brains and silk scaffold preparation. Scaffolds are punched into 6 mm diameter constructs with a 2 mm diameter central  
 109 hole. Laminin-coated scaffolds are seeded with dissociated human induced neural stem cells (hiNSCs). Decellularized ECM is  
 110 mixed with either collagen I or HA solution and added to the scaffolds seeded with cells. The cell-seeded silk-scaffolds are  
 111 flooded with media after complete gelation of ECM-collagen I or ECM-HA. The center of the construct shows a dense axonal  
 112 network representing white matter, surrounded by the neuronal cell bodies and astrocytes representing the grey matter.

113

## 114 **Results**

### 115 **Extracellular matrix and time-dependent differentiation of hiNSCs in 3D cultures**

116 We tested whether the presence of brain-derived ECM cues accelerated the differentiation of  
 117 hiNSCs into mature neurons and glia, particularly astrocytes, in the 3D bioengineered brain tissues. An  
 118 increased density of axonal network from differentiating neurons was observed in fetal ECM-enriched

119 constructs as shown by beta-III tubulin staining at 6 weeks, within both the axon rich central window  
120 (**Figure 1a-b**) and the scaffold portion of the constructs (**Figure 1a-c**). The axonal projections filled the  
121 central window significantly faster in the brain ECM-enriched constructs in comparison to  
122 unsupplemented collagen type I or HA, when collagen type I or HA were used as the hydrogels,  
123 respectively (**Figure 1b, Supplementary Figure 1a**). Additionally, time-dependent increased  
124 differentiation of hiNSCs into neurons and astrocytes was observed based on immunostaining (**Figure**  
125 **1d**). The astrocyte population was more evident in 2-month cultures, closely following the differentiation  
126 of neurons. Star shaped astrocytes, suggestive of mature resting astrocytes, were only visible in the brain  
127 ECM-enriched constructs, particularly in 7-month cultures (**Figure 1d**, marked by white arrows). The  
128 structural integrity of the neurons and astrocytes was maintained throughout the culture duration within  
129 the fetal brain ECM-enriched 3D brain tissue constructs (**Figure 1d**, left column). In contrast, unhealthy  
130 neuronal morphologies, visible either as traces of disintegrated axons or as debris of clumped neuronal  
131 cell bodies, were present in the unsupplemented collagen type I constructs at all time points, and were  
132 particularly evident at 7 months (**Figure 1d**, right column, marked by white arrow heads).

133         These qualitative observations were followed by the quantification of the volume covered by  
134 neurons and astrocytes within the 3D confocal stacks (3<n<6 per condition). The volume covered by  
135 neurons was significantly greater in the fetal ECM constructs than adult ECM or unsupplemented collagen  
136 I at 1 month, while the astrocytic population was not evident (**Figure 1d-e, Supplementary Figure 2**). A  
137 time-dependent increase in the ratio of astrocytes to neurons was confirmed in the fetal ECM constructs  
138 with an initial surge of astrocytes at 2 months (**Figure 1e**). The inclusion of porcine brain-derived ECM  
139 had no toxicity as shown by viability and lactate dehydrogenase (LDH) release profiles across all  
140 conditions (**Figure 1f, Supplementary Figure 3**).

141



142

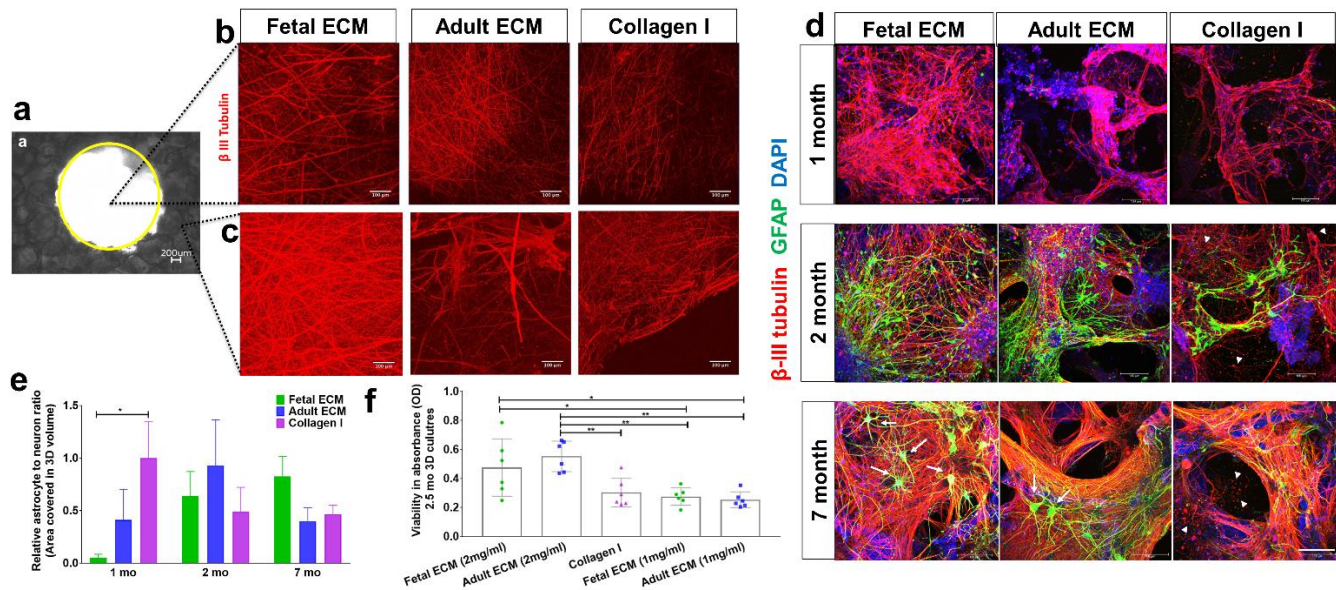

143

144

**Figure 1: Extracellular matrix and time-dependent differentiation of human induced neural stem cells in 3D cultures.**

145

Human induced neural stem cells (hiNSCs) in silk scaffold-based 3D constructs infused with collagen I hydrogels supplemented

146

with native porcine brain-derived ECM. (a) Brightfield image of silk scaffold with the middle circular window indicated by the

147

yellow outline. (b) Growth of differentiating hiNSCs at 6 wk shown by  $\beta$ -III tubulin staining for neurons within the middle

148

hydrogel window of the 3D donut-shaped constructs. Max projection of z-stack. Scale bar 100 $\mu$ m. (c) Growth of differentiating

149

hiNSCs at 6 wk shown by  $\beta$ -III tubulin staining for neurons within the ring portion of the 3D donut-shaped constructs. Max

150

projection of z-stack. Scale bar 100 $\mu$ m. (d) Growth and differentiation of hiNSCs at 1, 2 and 7 mo shown by  $\beta$ -III tubulin

151

staining for neurons (red) and GFAP staining for astrocytes (green) across different ECM conditions. Max projection of z-

152

stack. Scale bar 100 $\mu$ m. (e) Astrocyte to neuron ratio calculated by dividing the total volume in 3D confocal stacks covered by

153

astrocytes versus neurons post image processing. Mean $\pm$ SEM. One-way ANOVA with Dunnett's post hoc test (Collagen I as

154

control condition) at each time point on log transformed data, n=3-6. (f) Wst-1 viability assay at 2.5 mo in 3D hiNSC cultures.

155

One-way ANOVA with Tukey's post hoc for multiple comparisons. \* p< 0.0431, \*\* p< 0.0071.

156

157

Targeted RNA profiling of 3D bioengineered hiNSC cultures was performed to determine the

158

gene expression profiles of the differentiating cells (**Figure 2a**). Genes corresponding to neurons, ion



159 channels/receptors involved in calcium signaling, mature resting astrocytes, toxic reactive astrocytes,  
160 trophic reactive astrocytes, and neural stem cell were assessed. In 1-month cultures of fetal brain ECM-  
161 enriched tissue constructs, there was an upregulation of mature neuronal markers including synapsin 1  
162 (SYN1) and microtubule associated protein 2 (MAP2), and mature healthy astrocytes including excitatory  
163 amino acid transporter 1 (EAAT1), excitatory amino acid transporter 2 (EAAT2) (Sloan et al., 2017), and  
164 multiple epidermal growth factor-like domain protein 10 (MEGF10) (Chung, Allen, & Eroglu, 2015). All  
165 of these markers were higher than in unsupplemented collagen I cultures of similar age (**Figure 2a**). On  
166 the other hand, markers of toxic reactive astrocytes such as Serpina3 (Clarke et al., 2018) were  
167 downregulated in fetal brain ECM-enriched tissue constructs (**Figure 2a**). Concurrent upregulation of  
168 many different voltage gated ion channels (sodium, potassium and calcium) was evident in brain-ECM  
169 supplemented constructs, particularly with fetal brain ECM (**Figure 2a**), suggestive of excitability and  
170 synaptic transmission (Vacher, Mohapatra, & Trimmer, 2008).

171 Secretome profiling was used to characterize the cytokine release profile of differentiating  
172 hiNSCs. Soluble cytokines that are known to be important in astroglial differentiation (e.g., glial derived  
173 neurotrophic factor (GDNF) (Gowing et al., 2014)) and in generating/maintaining healthy  
174 neurons/synapses (e.g., Brevican (Barros, Franco, & Muller, 2011), PDGF-AA: platelet-derived growth  
175 factor AA (Funa & Sasahara, 2014), b-NGF: beta nerve growth factor (Schuldiner et al., 2001),  
176 thrombospondins (TSPs) (Risher & Eroglu, 2012)), were released in relatively greater amounts in brain  
177 ECM-enriched constructs in comparison to unsupplemented collagen I (**Figure 2b**). On the other hand,  
178 many cytokines associated with reactive astrocytes, including complement component 5a (C5a),  
179 Chemokine ligand 5 (RANTES) (Choi, Lee, Lim, Satoh, & Kim, 2014) and MMP-9 (Kamat, Swarnkar,  
180 Rai, Kumar, & Tyagi, 2014), were higher in unsupplemented collagen I cultures (**Figure 2b**). Thus,  
181 modulation of hiNSC differentiation into neurons and astrocytes was achieved using decellularized ECM

182 derived from specific developmental stages, with fetal brain-derived ECM resulting in overall highest  
 183 upregulation and release of neuronal supporting factors.

184

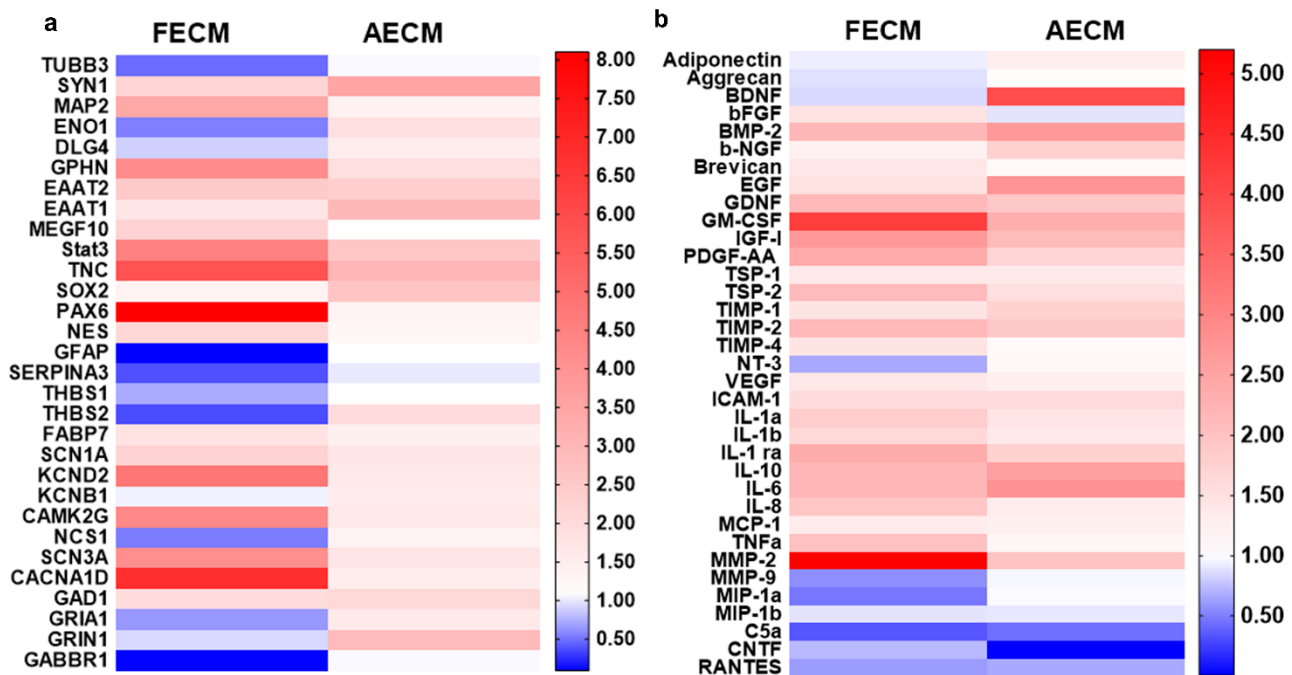

185 **Figure 2: Gene expression changes in 3D bioengineered human induced neural stem cell cultures (hiNSCs) cultured in**  
 186 **decellularized fetal or adult brain ECM.** (a) Left and right panels indicate fold change in gene expression within fetal ECM  
 187 and adult ECM-enriched constructs relative to collagen I condition, respectively. n=3 pooled per condition at 1 month. (b)  
 188 Cytokine release profile of differentiating hiNSCs in 3D bioengineered cultures at 1 month. Media was pooled from n=7 samples  
 189 per condition for the cytokine microarray. Refer to Tables 1-2 for the detailed list of genes and cytokines.

190

191 **Chondroitin sulfate proteoglycan secretion as a marker of astrocyte maturity and reactive**  
 192 **astrogliosis**

193 During development, chondroitin sulfate proteoglycans (CSPGs) are transiently upregulated and  
 194 produced largely by maturing neurons and astrocytes; however, during disease states reactive astrocytes  
 195 exhibit sustained upregulation of CSPG expression/secretion (Siebert, Conta Steencken, & Osterhout,

196 2014). Relative CSPG levels can thus be utilized as an indicator of astrogliosis (Yu et al., 2012). CSPGs  
197 released in 1 week and 1-month hiNSC cultures were significantly higher in fetal brain ECM-enriched  
198 constructs compared to either HA based (**Figure 3a**) or pure collagen type I hydrogels (**Figure 3b-c**), as  
199 measured in an ELISA. There was a significantly lower level of CSPG release in the brain ECM constructs  
200 at every time point post the initial month (**Figure 3c**). At longer culture durations, unsupplemented  
201 collagen type I containing cultures consistently showed the highest levels of CSPG release (**Figure 3c**).  
202 Additionally, the known morphological changes associated with reactive astrogliosis, including rapid  
203 proliferation and overlapping of cellular regions, was primarily seen in unsupplemented collagen type I  
204 matrices (**Figure 3d**). Therefore, based on the CSPG release profiles and GFAP-stained cell morphology  
205 (**Figure 3, Figure 1d**), even the nominal presence of native brain-derived ECM supported the  
206 differentiation and maintenance of healthy astrocytes when grown long-term in 3D cultures (at least up to  
207 7 months); as opposed to culturing in pure collagen type I matrix.

208

209

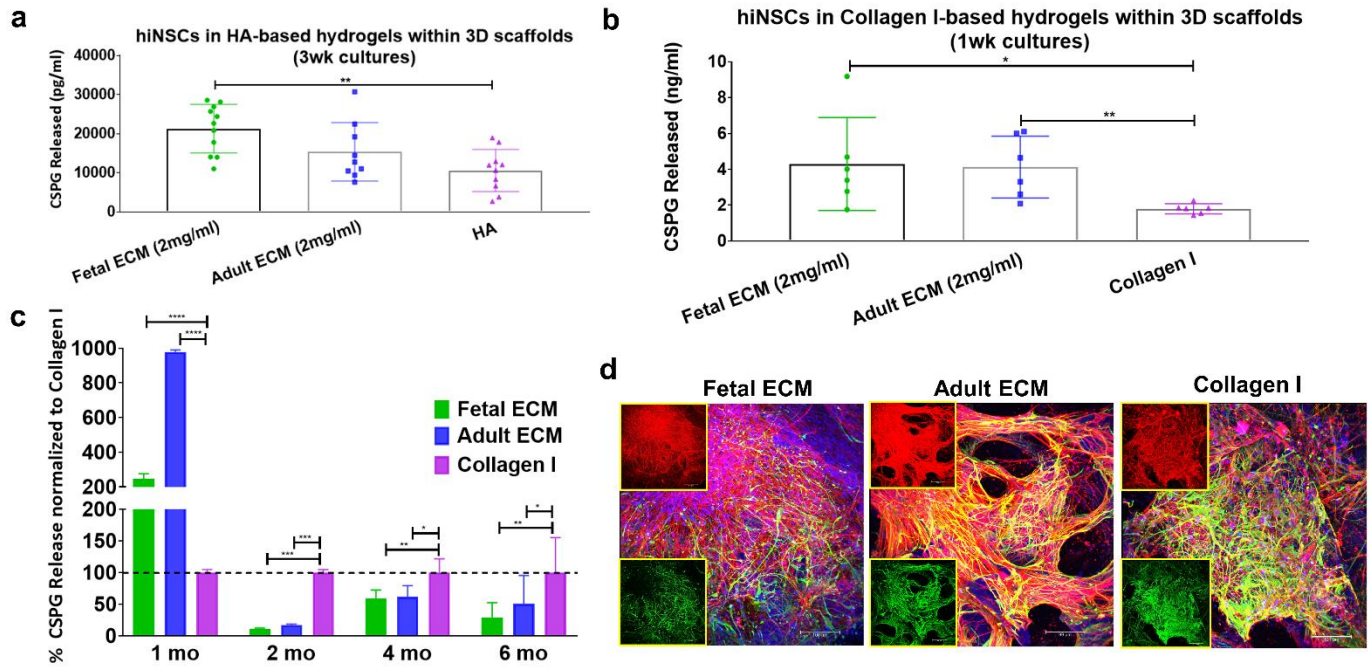

210

211 **Figure 3: Chondroitin sulfate proteoglycans as a marker of astrocyte maturity or reactive astrogliosis.** The amount of

212 chondroitin sulfate proteoglycans (CSPGs) released in media by the cells within 3D constructs. (a) CSPGs released in media

213 from hyaluronan-based 3D constructs at 3 wk. Unpaired two-tailed t-tests between individual pairs. (b) CSPGs released in

214 media from collagen-based 3D constructs at 1 wk. Unpaired two-tailed t-tests between individual pairs assuming equal SD. (c)

215 CSPGs released in media from collagen-based 3D constructs at different time points. Ordinary two-way ANOVA with

216 Dunnett's post hoc test and Collagen I as control condition, n=3-6. (d) Differentiating hiNSCs at 3 mo shown by  $\beta$ -III Tubulin

217 staining for neurons (red) and GFAP staining for astrocytes (green) across different ECM conditions. Insets show the red and

218 green channels separately. Max projection of z-stack. Scale bar 100 $\mu$ m. \* p < 0.0407, \*\* p < 0.0097, \*\*\* p < 0.0003, \*\*\*\* p <

219 0.0001.

220

221

## 222 **Extracellular matrix dependent function observed in long-term 3D cultures**

223 Calcium wave propagation in the developing brain has been implicated in the regulation of diverse  
224 cellular differentiation, through modulation of neurotransmitter expression, and axon and dendritic  
225 morphogenesis (Rosenberg & Spitzer, 2011). Differentiated neuronal and glial populations also exhibit  
226 robust and cell-specific calcium activity, including single cell spikes or network bursts (Kapucu et al.,  
227 2012). For instance, developing neurons have been shown to have increased spontaneous burst activity  
228 during the formation of synapses and networks related to their stabilization (Hua & Smith, 2004; Kamioka,  
229 Maeda, Jimbo, Robinson, & Kawana, 1996). Thus, the spatiotemporal patterns of calcium signaling in the  
230 3D developing cultures were assessed to decipher the role of ECM in modulating spontaneously functional  
231 networks.

232 Higher calcium fluorescence activity was observed in fetal ECM-enriched constructs than in adult  
233 ECM-enriched constructs and unsupplemented collagen I constructs. Specifically, greater spontaneous  
234 activity was recorded at 7 months via Fluo-4 dye (**Figure 4, Supplementary Videos 1-3**), than at 3 months  
235 (**Supplementary Figure 4, Supplementary Videos 4-6**). Moreover, the cluster analysis revealed that in  
236 fetal ECM constructs, more than 50% of the neural activity at rest was characterized by sustained  
237 oscillatory activity (cluster 1-2: **Figure 4A**), which was either tonic (cluster 1, **Figure 4A-a**) or amplitude-  
238 modulated and overlapped with spurious spikes (cluster 2, **Figure 4A-b**). The remaining cells, instead,  
239 remained in a quiescent state with modest oscillatory activity (cluster 3, **Figure 4A-c**). The percentage of  
240 clustered cells with sustained oscillatory activity patterns corresponding to clusters 1-2 was 63.3%, 55.5%  
241 (**Supplementary Figure 5A-B**) and 57.9% (**Figure 4A**), representing different replicates of fetal ECM  
242 constructs respectively. In addition, the similarity among patterns within the same cluster presented a  
243 recurrent trait (**Figure 4A-d**), where cells in the quiescent state (cluster 3, **Figure 4A-c**) or in the tonic  
244 oscillatory state (cluster 1, **Figure 4A-a**) had high in-cluster correlation and poor out-of-cluster correlation

245 (cluster 1:  $0.77\pm 0.21$  vs.  $-0.23\pm 0.42$ ; cluster 3:  $0.84\pm 0.16$  vs.  $-0.09\pm 0.41$ ; in-cluster versus out-of-cluster,  
246 mean  $\pm$  SD). On the other hand, cells showing amplitude-modulated spiking activity (cluster 2, **Figure**  
247 **4A**) had a low in-cluster correlation value ( $0.34\pm 0.43$  vs.  $-0.39\pm 0.35$ , in-cluster versus out-of-cluster, mean  
248  $\pm$  SD, **Figure 4A-d**). This trend was consistent across neural populations involving fetal ECM  
249 (**Supplementary Figure 5A-a and 5B-a**), and along with the scattered arrangement of cluster 2 cells in  
250 the construct (**Supplementary Figure 6 a-c**), indicated that the spontaneous spiking was decorrelated  
251 across cluster 2 cells and reflected a low-level of established connectivity.

252 Unlike the fetal case, constructs involving adult ECM presented a low percentage of clustered cells  
253 with spontaneous spiking activity (i.e., 19.6%, 40%, 27.27% corresponding to clusters 1 in **Figure 4B-a**,  
254 **Supplementary 7A-b** and **Supplementary Figure 7B-b**, respectively) and a majority of cells showed a  
255 generalized quiescent condition (**Figure 4B-b and c**), which rarely alternated with modest oscillatory  
256 activity (e.g.,  $\Delta F/F$  at the bottom of **Figure 4B-c**). This was further confirmed by the high inter-cluster  
257 similarity between cluster 2 and cluster 3 in **Figure 4B-d** ( $0.41\pm 0.37$ , Pearson's correlation coefficient,  
258 mean  $\pm$  SD) and remained consistent across different neural populations (see **Supplementary Figure 7A-**  
259 **B**). Analogously, neural population growth in collagen-based constructs had low percentages of cells with  
260 spontaneous spiking activity (23.9% of the population depicted in **Figure 4C** [cluster 1], 22.7% and 29.0%  
261 of the population in **Supplementary Figure 8A** [cluster 3] and **Supplementary Figure 8B** [cluster 1],  
262 respectively), while the majority of cells presented either a quiescent state or low-intensity oscillatory  
263 patterns (**Figure 4C**, panel b-c) with high in-cluster correlation values ( $0.82\pm 0.17$  and  $0.83\pm 0.16$ , cluster  
264 2 and 3, respectively, in **Figure 4C-d**), which indicated a low level of activity.

265 Overall, these results indicated that fetal ECM-based constructs supported neural populations with  
266 a higher fraction of active, spontaneously spiking neurons and on average, a more intense coordinated  
267 physiological activity.



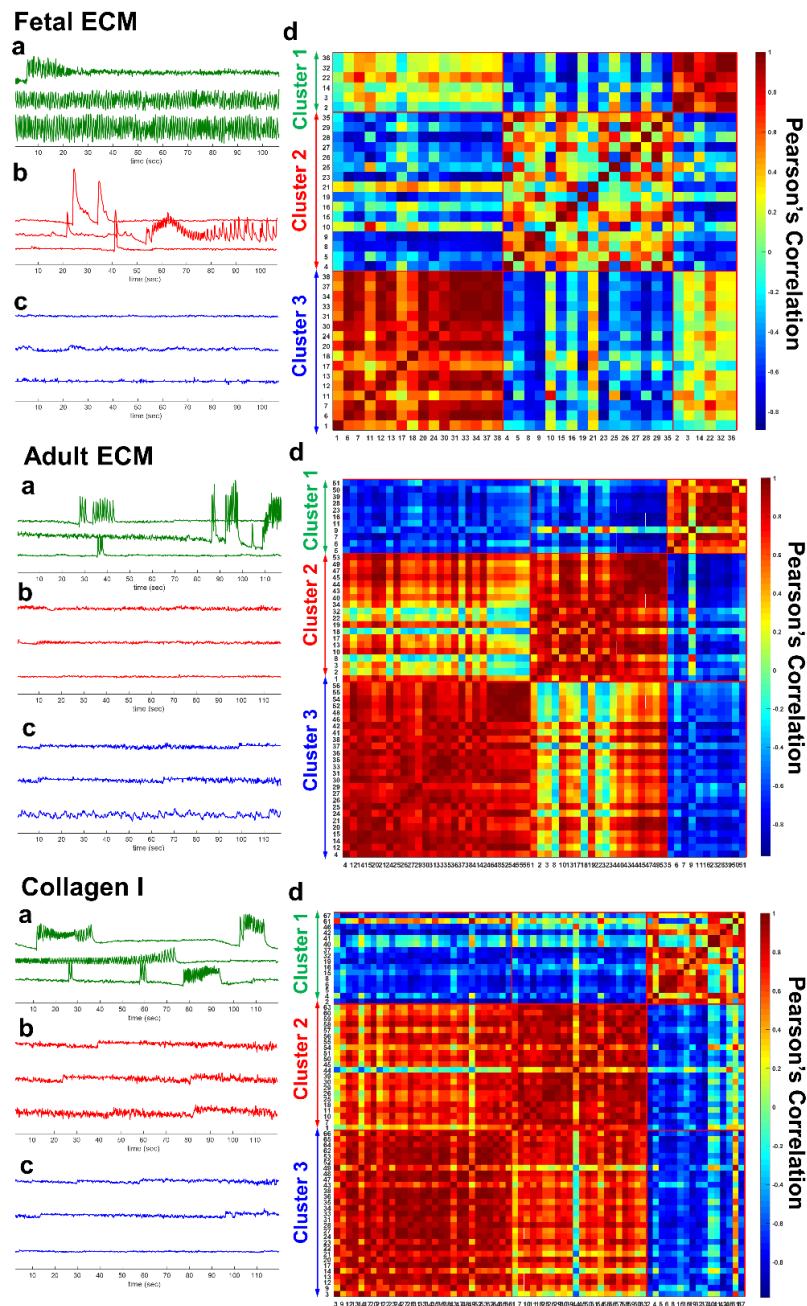

268

269 **Figure 4: Spontaneous calcium activity in 3D cultures of differentiating human neural stem cells at 7 months. . Panel A:**  
 270 **cells from a construct with fetal ECM; Panel B:** cells from a construct with adult ECM; **Panel C:** cells from a construct with  
 271 unsupplemented collagen I. In each panel: (a-c) Three clusters were identified using the Louvain algorithm and three examples  
 272 of  $\Delta F/F$  time series per cluster are reported (a: cluster 1; b: cluster 2; c: cluster 3). (d) Pearson's correlation coefficients between  
 273 vectors  $f$ . There is one vector per ROI and ROIs are sorted according to the cluster position. Numbers on the edges of the matrix  
 274 indicate the unique ID of the ROI.

275

276 **Transduction of hiNSCs with a neuron-specific reporter and genetically encoded calcium sensor**  
277 **for cell-specific tracking**

278 To longitudinally track neuronal populations, differentiating hiNSCs were transduced with  
279 adeno-associated virus-dj (AAV-dj), a hybrid serotype with a higher transduction efficiency and  
280 infectivity *in vitro* in comparison to other wild type AAV serotypes (Katrekar, Moreno, Chen, Worlikar,  
281 & Mali, 2018). The transduction virus enabled the expression of eYFP (yellow fluorescent protein)  
282 throughout the cell volume under the synapsin promoter, such that the arising mature neuronal populations  
283 could be tracked over time. Additionally, a genetically encoded calcium sensor, jRCaMP1b, was  
284 expressed in the differentiating hiNSCs under the synapsin promoter. The red-shifted calcium sensor,  
285 jRCaMP1b, was particularly chosen for several advantages; brighter/stable long-term expression over  
286 GCaMP6, imaging capability at greater depths with reduced photodamage, greater sensitivity and dynamic  
287 range before saturation (Dana et al., 2016). This dual transduction enabled label-free tracking of mature  
288 neurons over time in the cultures, while simultaneously allowing for visualization of calcium levels  
289 (**Figure 5a**). We confirmed the presence of mature neurons expressing eYFP and jRCaMP1b at both 3  
290 and 6 months in the 3D bioengineered cultures across all ECM conditions (**Figure 5b** upper and lower  
291 panels, respectively). Qualitatively, the neuronal networks were more intact and structurally robust in the  
292 fetal ECM-enriched constructs, with overall higher baseline calcium levels and increased network density  
293 at 6-months (**Figure 5b**, lower panel). Thus, differentiating neuronal populations were successfully  
294 transduced with dual viral constructs to specifically track these populations.

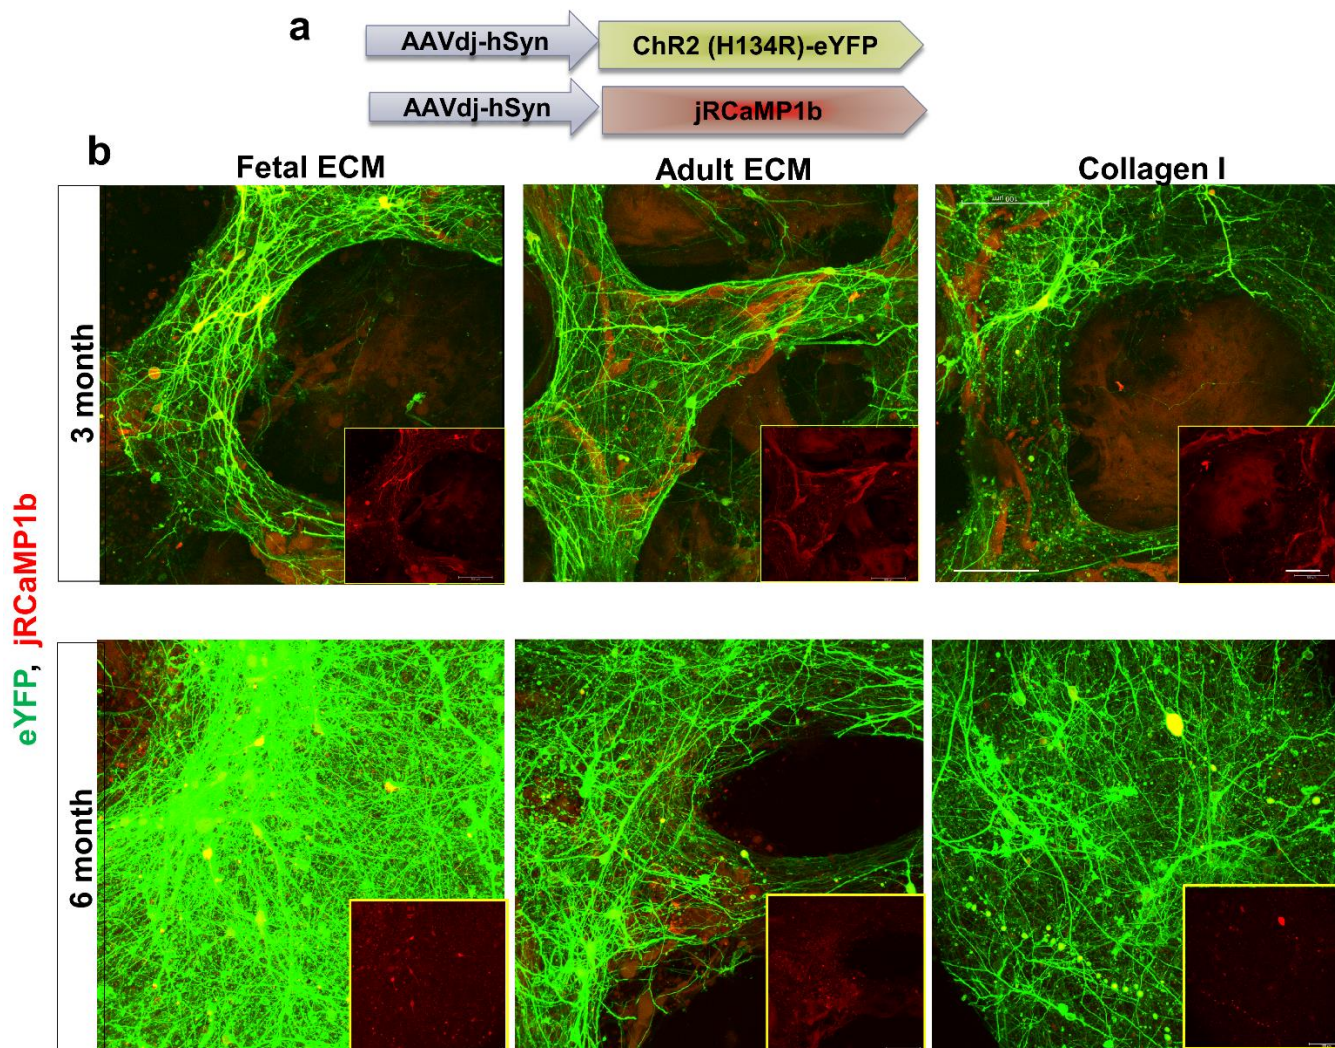

295

296 **Figure 5: Transduction of differentiating human induced neural stem cells for tracking mature neurons.** (a) High  
297 transduction efficiency virus, AAV-dj for expression of eYFP throughout the cell volume, a channelrhodopsin ChR2 (H134R)  
298 and calcium sensor jRCaMP1b under the synapsin promoter. (b) eYFP (green) and jRCaMP1b (red) expression at 3 and 6 mo  
299 in mature neurons differentiated from hiNSCs in silk scaffold-based 3D constructs infused with collagen I hydrogels  
300 supplemented with native porcine brain-derived ECM. Insets show jRCaMP1b channel only. Max projection of Z-stack. Scale  
301 bar 100 $\mu$ m.

302

303 **Composition analysis of decellularized brain extracellular matrix**

304 We sought to characterize the composition of fetal and adult brain matrices, which potentially  
305 contribute to the phenotypic changes in differentiation capacity and functionality that were observed upon  
306 culture of hiNSCs in these matrices. Through Liquid Chromatography-Mass Spectrometry (LC/MS), we  
307 confirmed that a complex composition of brain ECM was maintained post-decellularization. The  
308 components varied in relative amounts between fetal versus adult ECM, but included both fibrous proteins  
309 (up to 8 types of collagens, fibronectin, laminin), glycoproteins (nidogen, fibulin, fibronectin, fibrillins)  
310 and non-fibrous proteoglycans (heparin sulfate proteoglycans/HSPGs, biglycan, mimecan, lumican)  
311 (**Figure 6a**). Fibrillins were higher in fetal brain-derived ECM (**Figure 6b**). Furthermore, biglycans were  
312 enriched in the decellularized fetal brain ECM, when tested over multiple different extractions  
313 (**Supplementary Figure 9a**).

314 Considering a significant loss of GAGs during sample processing for LC/MS, we resorted to a  
315 specialized technique, Fluorescence Assisted Carbohydrate Electrophoresis (FACE), for GAG  
316 compositional analysis of the decellularized brain ECM (Calabro et al., 2001; Midura, Cali, Lauer,  
317 Calabro, & Hascall, 2018). FACE analysis of whole brain tissue indicated a greater amount of GAGs  
318 present in fetal versus adult brain (**Figure 6c-d, Supplementary Figure 9b-d**). This trend was maintained  
319 in the decellularized brain, with fetal ECM indicating significantly higher levels of GAGs versus adult  
320 ECM, specifically 4-sulfated chondroitin sulfate (4S-CS), 6S-CS and HA (**Figure 6c-d**). Additionally,  
321 HSPGs were present in higher amounts in fetal ECM (**Supplementary Figure 9d**).

322



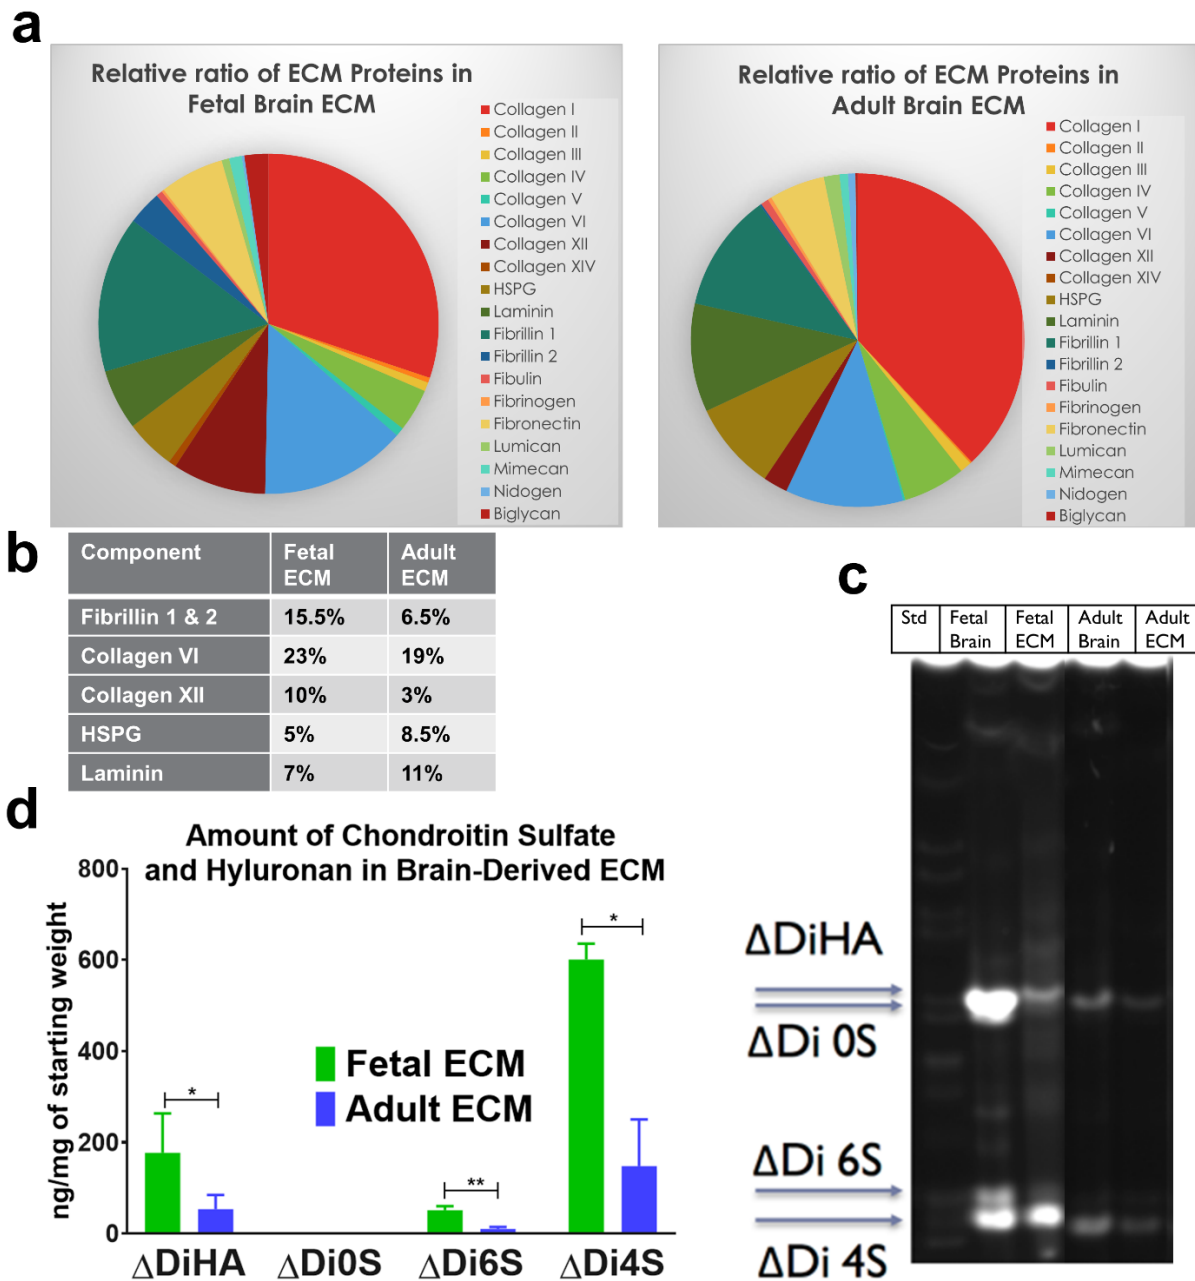

323

324 **Figure 6: ECM composition analysis using LC/MS and fluorescence assisted carbohydrate electrophoresis. (a)** Relative

325 ratios of ECM proteins in fetal versus adult porcine brain decellularized matrix. (b) Table indicating the relative percentages

326 of a few select ECM components in decellularized brain matrix. (c) Overall higher quantity of GAGs present in fetal brain

327 ECM, as opposed to adult brain ECM. Unpaired two-tailed t-tests on log-transformed data between individual pairs, n=3,

328 \*p<0.0439, \*\*p=0.0040. (d) Characterization of decellularized fetal & adult brain ECM in comparison to fetal and adult whole

329 brains by FACE. Chondroitin sulfate (CS) and hyaluronan (HA) bands in the fetal & adult porcine brain ECM.  $\Delta$ DiHA:

330 hyaluronan,  $\Delta$ Di0S: non-sulfated CS,  $\Delta$ Di6S: 6-sulfated CS,  $\Delta$ Di4S: 4-sulfated CS.

## 331 **Discussion**

332           There has been a growing interest in the use of *in vitro* 3D brain-like tissue systems for the study  
333 of neurological diseases using patient-derived stem cells (Lancaster et al., 2017; S. P. Pasca, 2016;  
334 Quadrato et al., 2016; Watson, Kavanagh, Allenby, & Vassey, 2017). Some of the limitations of these  
335 systems include inconsistent and slow co-differentiation of the cells towards neurons and supporting cells,  
336 such as astrocytes. Notably, Matrigel-based ECM hydrogels utilized for brain organoids, the current state  
337 of the art technology in the field, are poorly defined; this leads to variable differentiation effects such as  
338 inconsistencies in cortical layer formation and represented brain regions, including the presence of non-  
339 ectodermal identities (S. P. Pasca, 2018). Although, regionally specific brain ECM networks are reported  
340 to play major roles in generation of structural and functional diversity, little is known about how ECM is  
341 developmentally regulated in the brain (Dauth et al., 2016; S. P. Pasca, 2018). To our knowledge, the  
342 differentiation effects of fetal and adult brain ECM on human NSCs have not been characterized  
343 previously. Our previous study laid the foundation for the instructive role of decellularized fetal brain  
344 ECM in boosting primary mice neuronal culture (Sood et al., 2015). The current study investigated the  
345 composition and role of developmental stage-sourced brain ECM for enhanced and functional maturation  
346 of human induced neural stem cells (hiNSCs) into a co-culture of healthy neurons and astrocytes.

347           We sought to investigate the effects of developmentally sourced brain ECM in 3D bioengineered  
348 tissue systems. The advantages of a silk scaffold-based model proposed here over previously generated  
349 scaffold-free organoid cultures include structurally robust long term cultures without necrosis in the core,  
350 ease of handling and reproducibility, and segregation of gray matter and white matter with ease of  
351 monitoring neural network formation over time. We hypothesized that 3D brain constructs generated using  
352 brain-derived ECM would create a more physiologically relevant microenvironment conducive to growth  
353 and maturity of hiNSCs. We utilized hiNSCs directly reprogrammed from dermis-derived cells instead of



354 induced pluripotent stem cells (iPSCs) because they differentiate rapidly and efficiently into both neurons  
355 and glia, without the need for lengthy protocols required for iPSC differentiation that vary in efficiency  
356 (Cairns et al., 2016). We report functional networks with enhanced maturation of neurons, predominantly  
357 in fetal brain ECM-enriched cultures at both 3 and 7 months. These functional results correlated with the  
358 upregulation of various ion channels in fetal ECM cultures.

359         Achieving a mature astrocyte population with temporal and physiological relevance that  
360 recapitulates the phenotype of healthy astrocytes *in vivo* is crucial. Greater differentiation of hiNSCs into  
361 healthy astrocytes was expected in the presence of native brain-derived ECM due to the neuroinductive  
362 biochemical cues, leading to the generation of a more representative 3D *in vitro* model. Indeed, we report  
363 reactive astrocyte morphology, and consistent upregulation of CSPGs in cultures lacking brain-derived  
364 ECM. This is potentially the result of reactive astrogliosis in the pure collagen I cultures at longer  
365 durations, because reactive astrocytes have been predominantly indicated for CSPG upregulation and  
366 sustained secretion in adult central nervous system (Cua et al., 2013; Pantazopoulos, Woo, Lim, Lange,  
367 & Berretta, 2010). For instance, reactive astrocyte-derived CSPG subtypes including versican V2,  
368 neurocan and phosphocan have been shown to hinder axonal growth in spinal cords of amyotrophic lateral  
369 sclerosis (ALS) patients (Mizuno, Warita, Aoki, & Itoyama, 2008). In healthy cultures, CSPGs are  
370 expected to be lowered and stabilized mainly in perineuronal nets (PNNs); this is following the initial  
371 surge and in relevance to brain development where maturing neurons/astrocytes transiently upregulate  
372 CSPGs (Mueller, Davis, Sovich, Carlson, & Robinson, 2016). This was the case for brain ECM-enriched  
373 cultures, which also indicated the presence of morphologically healthy mature astrocytes (Cullen,  
374 Stabenfeldt, Simon, Tate, & LaPlaca, 2007). Additionally, we approximated the subtypes of differentiated  
375 astrocytes within brain ECM-enriched 3D bioengineered brain cultures via gene expression arrays and  
376 secretome profiling. Resting mature astrocytes identified by markers such as glutamate transporters

377 (EAAT1, EAAT2) and phagocytic genes (MEGF10) (Sloan et al., 2017) rarely proliferate; but assume a  
378 reactive morphology and distinct markers upon activation either towards the toxic pro-inflammatory A1  
379 or the trophic A2 subtypes (Liddelow & Barres, 2017). The existence of these two polarized populations  
380 of reactive astrocytes has been postulated, similar to macrophage polarization to subtypes M1 and M2  
381 [56]. The pro-inflammatory A1 reactive astrocytes lose normal astrocytic functions such as neuronal  
382 outgrowth, synaptogenesis and phagocytosis, and instead contribute to neuronal death by glial scar  
383 formation and by releasing toxic factors (Clarke et al., 2018; Liddelow et al., 2017). The secretome  
384 profiling of the 2 subtypes have indicated preferentially higher release of thrombospondins from the A2  
385 trophic astrocytes, which was noted to be the case for brain ECM containing cultures. Notably, the  
386 peptidase inhibitor serpin3a, which is postulated to be a specific marker of A1 reactive astrocytes (Lee  
387 et al., 2009; Zamanian et al., 2012), was downregulated within fetal brain ECM cultures.

388           Additionally, our results indicated that differentiated neurons appeared early, while astrocytes  
389 arose with increasing time in culture. The initial surge in neuronal maturation within the fetal ECM-  
390 enriched constructs leveled off at later time points. These responses are in line with the known switch  
391 towards astroglial differentiation of a multipotent cell, which initially gives rise to neuronal precursors  
392 through changes in receptor expression (Wiese et al., 2012). Moreover, maintenance of a stable astrocyte-  
393 to-neuron ratio with relevance to known *in vivo* values (~1.4), is critical in *in vitro* brain tissue models,  
394 since this ratio is dynamic initially during development and known to increase in disease states  
395 (Nedergaard, Ransom, & Goldman, 2003). We report an astrocyte to neuron ratio with *in vivo* relevance  
396 in the generated *in vitro* brain tissue models when supplemented with fetal brain-derived ECM.

397           Delineating the basis for the divergence of observed cellular responses through the biochemical  
398 analysis of the brain-derived ECM may have implications for generating 3D *in vitro* brain disease models  
399 that are more representative with sufficient maturity levels. For instance, we noted overall higher amounts

400 of fibrillins (**Figure 6b**) and biglycans in fetal ECM (**Supplementary Figure 9a**), which could present a  
401 potential mechanism for control of reactive astrogliosis and warrants further inquiry. Fibrillin 1 expression  
402 is developmentally regulated and it acts as a reservoir for transforming growth factor- $\beta$  (TGF- $\beta$ ) in ECM.  
403 Downregulation of fibrillin 1 has been associated with increased TGF- $\beta$  signaling (Burchett, Ling, &  
404 Estus, 2011). TGF- $\beta$  on the other hand is a known inducer of reactive astrogliosis (Yu et al., 2012). We  
405 postulate that the fibrillins present in decellularized brain ECM could potentially harbor specific growth  
406 factors, such as TGF- $\beta$ , and thus, control reactive astrogliosis in long-term 3D cultures enriched with brain  
407 ECM. Moreover, biglycan proteoglycans have been noted for their role in maintaining synaptic stability  
408 (Nastase, Young, & Schaefer, 2012). We further attribute the favorable effects of fetal brain ECM on the  
409 maturation of neural stem cells to the fact that this prenatal brain matrix allows for plasticity during  
410 development. Similarly, decellularized zebrafish brain, known for its remarkable plasticity and CNS  
411 regeneration capability, was recently shown to promote rat cortical neuronal viability and network  
412 formation in a scaffold-based culture system (S. M. Kim, Long, Tsang, & Wang, 2018).

413 In our 3D bioengineered cultures, collagen type I was mainly used as a base matrix into which  
414 brain ECM was incorporated, as it was deemed most stable for long term culture and best for neuronal  
415 growth through screening of different commercially available matrices (Sood et al., 2015). We also tested  
416 a custom tyramine-HRP crosslinked HA hydrogel supplemented with decellularized brain ECM  
417 (**Supplementary Figure 1 b/d**); however, it underwent rapid degradation. Further fractionation and  
418 analysis of ECM components will be needed to decipher the role of specific components towards  
419 differentiation of neural stem cells. The scaffold-based 3D tissue system is well suited to undertake studies  
420 for deciphering the role of specific ECM components during brain development or disease.

421 Furthermore, through transduction of differentiating neurons with an opsin, e-YFP reporter and  
422 genetically encoded calcium sensor (GECI), we demonstrated that this system is amenable to live tracking

423 as well as all optical interrogation of cells over long-term cultures. Similar approaches could be used to  
424 place an opsin and GECI under a healthy astrocyte promoter, with distinct spectral profiles from those  
425 placed under the neuronal promoter synapsin; which would eventually enable studies of cell-cell  
426 interactions towards the generation of network patterns and dissect cell-specific signaling. Moreover, the  
427 resulting scaffold-based brain tissue model with concomitant presence of neurons and astrocytes is highly  
428 tunable from a structure-morphological perspective. This feature enables gray/white matter segregation  
429 and presents potential for spatially controlled introduction of morphogens or other cell types in future  
430 iterations, such that their roles in neurodegenerative diseases can be investigated.

### 431 **Conclusions**

432 First, we report healthy mature astrocyte morphology supported by relevant gene  
433 expression/cytokine release, and downregulation of CSPGs in cultures supplemented with brain-derived  
434 ECM. Our results indicate that differentiated neurons appeared early, closely followed by astrocytes. Such  
435 systems would be useful to investigate neurodegenerative disorders, many of which have implicated  
436 reactive astrogliosis as a cause or consequence. Next, the combined functionality of cells differentiated  
437 from hiNSCs in the 3D bioengineered tissue model, revealed greater overall spontaneous activity at 7-  
438 month versus 3-month cultures. Clear differences were observed across ECM conditions, including more  
439 active clusters overall, increased coordinated activity, highest concurrent upregulation of voltage gated  
440 ion channels and downregulation of markers of toxic reactive astrocytes in the fetal ECM-enriched  
441 constructs. Furthermore, live tracking of differentiating neurons in long-term 3D cultures was achieved  
442 using genetically encoded biosensors.

443 This is the first study to examine the composition of decellularized brain ECM from different  
444 developmental stages, specifically glycosaminoglycans (GAGs), and to identify native stimulatory cues  
445 relevant for functional maturation of hiNSCs over long term in 3D bioengineered brain constructs

446 supplemented with decellularized fetal and adult porcine brain ECMs. Moreover, the combination of the  
447 proposed measurements of neurons and/or astrocytes with functional optogenetic interrogation in future  
448 iterations holds the potential to help unravel cell-matrix crosstalk and to understand the interactions  
449 between cell types in healthy versus diseased states. Altogether, the knowledge gained has the potential  
450 to enable the development of brain-specific biomaterials for generating physiologically-relevant 3D *in*  
451 *vitro* brain models.

452

## 453 **Materials and Methods**

### 454 **3D Bioengineered Brain Model with hiNSCs**

455 Assembly of the bioengineered cortical tissue was performed as previously described with further  
456 optimization (Chwalek, Sood, et al., 2015). Briefly, porous silk 3D scaffolds were coated with 0.05-0.5  
457 mg/mL laminin (Sigma-Aldrich) either overnight at 4°C or for 2 h at 37°C. The scaffolds were incubated  
458 in media at 37°C for at least 30 mins to equilibrate the scaffolds for cell seeding. Expanding hiNSCs were  
459 lifted off mouse embryonic fibroblasts (MEFs) using TrypLE Select and centrifuged at 3,000 rpm for 1.5  
460 mins. The cell pellet was resuspended in hiNSC expansion media consisting of KnockOut Serum  
461 Replacement DMEM (Thermo Fisher, cat#10829-018), GlutaMax (Thermo Fisher, cat#35050-061),  
462 KnockOut SR (Thermo Fisher, cat#A1099202), Antibiotic-Antimycotic (Thermo Fisher, cat#15240-062)  
463 and 2-mercapto (Thermo Fisher, cat#21985-023), bFGF Basic (Thermo Fisher, cat#PHG0024), as  
464 previously defined (Cairns et al., 2016). The resuspended cell solution was vortexed and passed through  
465 a 40µm filter to achieve single cell suspension. The resulting single cells obtained from hiNSC colonies  
466 were seeded on the 3D ring-shaped silk scaffolds at a concentration of 0.5-1 million in 100µl volume per  
467 scaffold. After overnight incubation of 100µl hiNSC concentrated cell suspension per scaffold in a 96-

468 well plate to maximize cell attachment to the laminin coated silk, the unattached cells were washed away  
469 with the hiNSC expansion media. Next, the hiNSC cell-seeded scaffolds were infused with either 3 mg/mL  
470 rat tail collagen type I (Corning), a commonly used matrix or with collagen-native brain ECM composite  
471 hydrogels.

472 For the generation of ECM-collagen I hydrogels, porcine brain ECM from different  
473 developmental stages were obtained via a previously developed decellularization process (Sood et al.,  
474 2015). Lyophilized ECM was solubilized with 1 mg/mL pepsin from porcine gastric mucosa (Sigma-  
475 Aldrich) in 0.1N hydrochloric acid (Sigma-Aldrich). The solubilization time for fetal and adult ECM at  
476 room temperature was approximately 16 and 24 h, respectively. Once solubilized, the ECM was mixed  
477 with hiNSC differentiation media (Neurobasal media supplemented with 1% B27, 1% glutamax and 1%  
478 anti-anti) at a 1:1 ratio and neutralized using 1 M NaOH (Sigma-Aldrich). The neutralized ECM solution  
479 was mixed with 3 mg/mL rat tail collagen type I (Corning) for a final ECM concentration of 1,000 µg/ml  
480 or 2000 µg/ml and the gelation process started using NaOH. The ECM-collagen solution was kept on ice  
481 until complete gelation was required and was used within 2 h of preparation. For hyaluronic acid (HA)  
482 hydrogels, 5.5% tyramine-substituted HA (Lifecore) was reconstituted under sterile conditions at 10  
483 mg/ml in ultrapure water overnight at 4°C on a shaker. To obtain HA gels of ~1 kPa bulk modulus, final  
484 optimized concentrations of HA (4 mg/ml), horseradish peroxidase (1 U/mL of gel), hydrogen peroxide  
485 (0.005% v/v) and pH adjusted 10x DMEM (1x in gel) were mixed together on ice. The remaining volume  
486 was adjusted by addition of ultrapure water. In the case of ECM-HA hydrogels, 10x DMEM (final 1x in  
487 gel) was added to solubilized ECM, which was further pH adjusted and then mixed with the rest of the  
488 components. HA hydrogels were prepared in small volumes (~1ml) due to their rapid gelation time and  
489 added to scaffolds immediately. After introduction within the cell-seeded scaffolds, the gelation was  
490 completed in 30 mins at 37°C, following which more media was added to each well with the constructs.



491 The next day, each of the ECM containing cell-seeded 3D constructs was moved to a larger well of a 24-  
492 well plate with sufficient media.

### 493 **Immunostaining and Quantification of Area Covered by Neurons versus Astrocytes**

494 At different time points (1, 2, 7, 13 months) in 3D cultures, cells were evaluated for neuronal  
495 network density and differentiation into neurons and astroglial cells with immunostaining. The samples  
496 were fixed at different time points with 4% paraformaldehyde (PFA) solution in PBS (Santa Cruz  
497 Biotechnology). Fixation time was 20-30 mins for the 3D constructs. The cells were stained with beta-III  
498 tubulin and GFAP (Sigma-Aldrich) as markers for neurons and astrocytes, respectively. Primary antibody  
499 incubations were performed at 4°C overnight, while the secondary antibody incubations were carried out  
500 at room temperature for 2 h. The volume covered in 3D stacks was measured using a custom code  
501 generated in MATLAB. Briefly, the 3D stacks corresponding to either beta-III tubulin or GFAP were  
502 binarized, such that there are only two possible values corresponding to each pixel (black or white). The  
503 volume covered was represented as the total number of positive pixels (black) divided by the total pixels  
504 (corresponding to either black or white pixels) of all the planes in the corresponding z-stack.

### 505 **Calcium Imaging and Cluster Analysis**

506 Differentiated cell functionality was determined using live calcium imaging at 3 and 7 months in  
507 culture. Cells seeded on 3D scaffolds were immersed in extracellular solution: NaCl 140 mM, KCl 2.8  
508 mM, CaCl<sub>2</sub> 2 mM, MgCl<sub>2</sub> 2 mM, HEPES 10 mM, glucose 10 mM, pH 7.4, (all reagents from Sigma-  
509 Aldrich). Fluo-4 (Life Technologies Corporation) calcium sensitive dye was mixed 1:1 with 20% Pluronic  
510 F127 (Life Technologies Corporation). Next, Fluo-4 was diluted to a final concentration 1 μM in the  
511 extracellular buffer prewarmed to 37°C. The Fluo-4 1 μM solution was applied on the scaffolds and  
512 incubated at 37°C for 1 h. Upon incubation, the constructs were washed with the extracellular buffer to

513 remove excess dye. The constructs were imaged using the Keyence BZ-X700. The images were taken  
514 with following setup: 15 ms exposure, 50 ms frame frequency,  $512 \times 512$  pixels,  $4 \times 4$  binning, 1200  
515 frames/min at  $37^\circ\text{C}$ . Images were processed offline using the NIH ImageJ software suite.

516 Regions of interest (ROIs) were extracted automatically from a series of calcium images over  
517 time, following a two-step approach. First, the variance of the brightness of each pixel through time was  
518 computed, allowing for the generation of a heatmap. The heatmap was convolved with a 2-D Gaussian  
519 kernel with a standard deviation computed from the resolution and magnification of the images, to ensure  
520 continuity and to reduce noise. Next, the local maxima of the filtered heatmap were found and used as  
521 seed points to isolate discrete regions, each representing an ROI. Finally, fluorescence intensity time traces  
522 were plotted on the center of mass of the discrete regions (single pixel data).

523 For each ROI, the relative change in fluorescence was calculated as

524 
$$\Delta F / F = \frac{F - F_0}{F_0},$$

525 where  $F$  is the fluorescence time series and  $F_0$  is the baseline of  $F$  estimated from a  $\pm 15$  s sliding window.  
526 Due to the sparse activity,  $F_0$  was calculated as the average of all values below the 80<sup>th</sup> percentile in  $F$ .  
527 Finally, a second order Savitzky-Golay filter was applied to the  $\Delta F/F$  signal to remove noise while  
528 preserving the signal frequency span.

529 The  $\Delta F/F$  signals collected from the isolated ROIs were used for cluster analysis as in (Tang-  
530 Schomer, Jackvony, & Santaniello, 2018). Briefly, each  $\Delta F/F$  was processed to compute the following  
531 features, which collectively provide a time-frequency characterization that is unique to the  $\Delta F/F$  signal:

532 1) Line-length:  $f_1 = \frac{1}{N} \sum_{k=1}^{N-1} |\Delta F / F(k+1) - \Delta F / F(k)|;$

533 2) Standard Deviation:  $f_2 = \frac{1}{N} \sqrt{\sum_{k=1}^N (\Delta F / F(k) - \mu)^2}$  ;

534 3) Entropy:  $f_3 = -\sum_n p_n \log_2 p_n$  ;

535 4) Spectral peak:  $f_4 = \arg \max_{\omega} P_{\Delta F/F}(\omega)$  ;

536 5) Spectral centroid:  $f_5 = \frac{\int \omega P_{\Delta F/F}(\omega) d\omega}{\int P_{\Delta F/F}(\omega) d\omega}$  ;

537 6) Energy:  $f_6 = \sum_{k=1}^N (\Delta F / F(k))^2$  ;

538 7) Global/local peak ratio:  $f_7 = \frac{g^*}{\sum_{g_i \in G, g_i < g^*} \frac{g_i}{J-1}}$  ,

539 where  $\Delta F/F(k)$  is the  $k$ -th sample in the  $\Delta F/F$  time series,  $N$  is the total number of samples in  $\Delta F/F$ ,  $\mu$  is  
 540 the average value of  $\Delta F/F$ , and  $P_{\Delta F/F}(\omega)$  is the power spectrum density of the  $\Delta F/F$  signal at frequency  
 541  $0 \leq \omega \leq F_s/2$ , where  $F_s$  is the number of frames per second. To estimate the entropy (3), the sample  
 542 probability function of the  $\Delta F/F$  intensity values is computed and the correspondent sample probability  
 543 values  $p_n$  are used. The spectral peak (4), instead, is the frequency  $\omega$  of the maximum power spectrum  
 544 density value  $P_{\Delta F/F}(\omega)$ . Finally, the peak ratio (7) is estimated by computing all the local maxima (i.e.,  
 545 peaks)  $G = [g_1, g_2, g_3, \dots, g_J]$  of the  $\Delta F/F$  signal and the absolute maximum (i.e., global peak)  $g^*$  among  
 546 the peaks in  $G$ . In addition to features (1)-(7), the entropy of the squared-normalized Teager Energy vector  
 547 was computed. Briefly, the Teager Energy series was computed:

548 
$$T(k) = \begin{cases} \Delta F / F(k) - \Delta F / F(k-1) \times \Delta F / F(k+1) & k = 2, 3, \dots, N-1 \\ 0 & otherwise \end{cases}$$

549 and the sample entropy is computed as:

550 8) Teager Energy entropy:  $f_8 = -\sum_{k=1}^N S(k) \log_2 S(k)$ ,

551 where  $S(k)$  is the squared and normalized version of  $T(k)$ , i.e.,  $S(k) = T^2(k) / \sum_j T^2(j)$ . Features (1)-(8) were  
552 introduced in (Blanco et al., 2010) and provide high accuracy in distinguishing activity patterns that  
553 involve different oscillations, bursting modes, or spurious spiking.

554 The  $8 \times 1$  vectors  $f = [f_1, f_2, f_3, \dots, f_8]$  (one vector per ROI) were finally used to cluster the ROIs,  
555 i.e., the Pearson's correlation coefficient was computed for every pair of detected ROIs and two ROIs in  
556 one preparation were assigned to the same cluster if they had highly-correlated feature vectors. The  
557 number of clusters and the cluster assignment were determined in an unsupervised manner using the  
558 Louvain algorithm (Blondel, Guillaume, Lambiotte, & Lefebvre, 2008). The Louvain algorithm assigns  
559 the ROIs to clusters by maximizing a quantitative index that weights both the average similarity between  
560 feature vectors inside clusters and the average similarity between vectors across clusters. Because the  
561 Louvain algorithm is a locally greedy optimization algorithm, the procedure was repeated for a total of  
562 100 optimizations and a consensus partition method was implemented as in (Lancichinetti & Fortunato,  
563 2012) to obtain a consistent cluster partition for each culture.

#### 564 **Transduction of hiNSCs with viral constructs**

565 The starting viral titer of AAVdj-hSyn-jRCaMP1b and AAVdj-hSyn-hChR2(H134R)-eYFP  
566 (Stanford University Virus Core) was  $1.78 \times 10^{13}$  and  $3.62 \times 10^{13}$ , respectively. The virus was diluted at  
567 1:1000 dilution in cell culture media for differentiating hiNSCs. Each cell-seeded scaffold was incubated  
568 in 400  $\mu$ l media containing virus and exposure to the virus was maximized by adding additional media in  
569 the same well for an entire week. One-week post-infection, virus-containing media was replaced with  
570 fresh media. Virally transduced tissue constructs were imaged with a multiphoton confocal microscope  
571 (TCS SP8, Leica) equipped with a Ti-Sapphire laser. During imaging, each sample was placed in a well

572 of a glass bottomed (No. 1.5 coverslip) 24-well plate. The imaging chamber was maintained at 37°C and  
573 humidified along with a continuous supply of 5% CO<sub>2</sub>.

#### 574 **Analysis of brain-derived ECM**

575 ***Liquid Chromatography Tandem Mass Spectrometry***: Lyophilized ECM samples were weighed  
576 and solubilized at 5 mg/ml in 0.1% sodium dodecyl sulfate (SDS) in PBS containing 5M urea, 2M thiourea  
577 and 50 mM Dithiothreitol (DTT). The samples were solubilized for ~24 hrs at 4°C with gentle stirring.  
578 Following this step, the solubilized ECM samples were acetone precipitated for 2 hrs at -20 °C (Williams,  
579 Quinn, Georgakoudi, & Black, 2014). The obtained pellets following removal of the supernatant were  
580 sent for liquid chromatography tandem mass spectrometry (LC-MS/MS) at the Beth Israel Deaconess  
581 Medical Center Mass Spectrometry Core facility. The resulting spectral count data was scanned to find  
582 the most abundant ECM proteins (n=2 per ECM condition was analyzed).

583 ***Fluorophore-assisted Carbohydrate Electrophoresis (FACE)***: Fluorophore-assisted  
584 carbohydrate electrophoresis was performed on lyophilized adult and fetal porcine brain ECM samples,  
585 using a previously developed protocol for glycosaminoglycan (GAG) analysis (Calabro, Benavides,  
586 Tammi, Hascall, & Midura, 2000). Briefly, the dry weight of the ECM samples was measured, followed  
587 by digestion in 1mg/ml proteinase K at 60°C for 2 h. Hyaluronan and chondroitin sulfate present within  
588 the samples were digested using the following enzymes: chondroitinase ABC (Seikagaku 25mU/ml) and  
589 hyaluronidase SD (Seikagaku 2.5mU/ml). Following ethanol precipitation and proteinase K heat  
590 inactivation, the ECM samples within the resulting pellet were incubated in the enzymes at 37°C  
591 overnight. A second ethanol precipitation step was performed, and the resulting hyaluronan/CS glycans  
592 were retained within the supernatants after centrifugation. The glycans were labeled with the fluorophore  
593 2-amino-acridone (AMAC) by incubation at 37°C for 18 h. Finally, the labeled samples and standard  
594 disaccharides were loaded onto gels at lower volumes of 2-5µl as opposed to ~30µl in protein gels, to aid

595 in band resolving. Electrophoresis was performed at a constant 500V for 1 h 15 mins and FACE imaging  
596 was accomplished using a UVP Chemi-DocIt2 515 integrated system. Band quantifications were  
597 performed in ImageJ. To calculate the concentration of disaccharides in ECM samples, sample band  
598 intensity was divided by the intensity of the respective known standard. Relative intensities of disaccharide  
599 bands across samples were normalized by the starting dry weight.

## 600 **Statistics**

601 Statistical analysis was performed using GraphPad Prism 7 software (GraphPad, CA, USA). All  
602 data are expressed as mean  $\pm$  SD with sample sizes of  $n \geq 3$ , unless stated otherwise. The analysis methods  
603 utilized included ordinary two-way and one-way ANOVA, followed by Tukey's *post hoc* or Dunnet's *post*  
604 *hoc* test when assigning unsupplemented hydrogels as the control condition to determine the statistically  
605 significant differences for multiple comparisons, and unpaired two-tailed t-test for comparison of two  
606 groups, unless stated otherwise.

607 Samples were chosen randomly for the different experiments to account for any potential  
608 unavoidable biological variability. This included randomization post cell seeding within the scaffold and  
609 before allocation into different groups for ECM hydrogel addition. For clustering analysis of calcium  
610 imaging the investigator was blinded to the different groups.

611

## 612 **Acknowledgements**

613 This work was funded by the US National Institutes of Health (NIH) P41 Tissue Engineering  
614 Resource Center Grant (EB002520), NIH R01 (NS092847) and NIH Research Infrastructure grant NIH  
615 S10 OD021624. Additionally, we would like to acknowledge PEG funding support for FACE training  
616 (NIH/NHLBI 1P01HL107147 Program of Excellence in Glycosciences; VC Hascall, PD/PI). We thank

617 Mattia Bonzanni, Min Tang-Schomer, Annie Golding, Kelly Sullivan, Breanna Duffy, Whitney Stoppel  
618 and Jonathan Grasman for helpful discussions and protocols. We also thank Yu-Ting Dingle for timely  
619 help in feeding the long-term cultures and Breanna Duffy for running LC/MS samples. Additionally, we  
620 would like to extend a special thanks to Valbona Cali, Dr. Ronald Midura, Dr. Vince Hascall and Dr.  
621 Suneel Apte for training in FACE analysis at Lerner Research Institute and for their expert feedback.

622

### 623 **Author Contributions**

624 D.S. and D.L.K. conceptualized and designed the experiments, D.S. conducted the experiments,  
625 performed data analysis, data interpretation and compiled the manuscript. D.C. generated and expanded  
626 hiNSCs, advised during different stages of experimental planning, and contributed to manuscript writing.  
627 J.D. performed confocal imaging analysis, calcium imaging ROI extraction and assisted with experiments.  
628 C.R. prepared the viral constructs for neuronal transduction. C.R. and K.D. provided training at Stanford  
629 University and advised on the viral transduction protocols. L.D.B. helped conceptualize the use of  
630 developmental stage decellularized brain ECM and advised on the results. S.S. conducted cluster analysis  
631 of calcium imaging data, and contributed to clustering data interpretation and manuscript writing. D.L.K.  
632 supervised experiments and enabled all stages of manuscript preparation. All authors provided their  
633 feedback on the final manuscript.

634

### 635 **Authors and Affiliations**

636 Disha Sood<sup>1</sup>, Dana M. Cairns<sup>1</sup>, Jayanth M. Dabbi<sup>1</sup>, Charu Ramakrishnan<sup>2</sup>, Karl Deisseroth<sup>2</sup>, Lauren D.  
637 Black III<sup>1</sup>, Sabato Santaniello<sup>3</sup>, David L. Kaplan<sup>1</sup>



638 <sup>1</sup>Department of Biomedical Engineering, Tufts University, Medford MA 02155

639 <sup>2</sup>Department of Bioengineering, Stanford University, Stanford CA 94305

640 <sup>3</sup>Neural Systems Engineering and Control Laboratory, University of Connecticut, CT 06269

641

642 **Disclosures**

643 None.

644

645 **Competing Financial Interests**

646 None.

647

648 **Data Availability Statement**

649 All data is included within the manuscript and supplementary sections. A master source data file has been  
650 provided for Figures 1-3, 6 and Supplementary Figures 2 and 9. Source data and Matlab codes used to  
651 generate Figure 4 and Supplementary Figures 5, 7 and 8 are provided in a separate zip folder labeled-  
652 Calcium Imaging Analysis Files.

## 653 Bibliography

- 654 Avior, Y., Sagi, I., & Benvenisty, N. (2016). Pluripotent stem cells in disease modelling and drug discovery. *Nature*  
655 *Reviews Molecular Cell Biology*.
- 656 Avram, S., Shaposhnikov, S., Buiu, C., & Mernea, M. (2014). Chondroitin sulfate proteoglycans: structure-function  
657 relationship with implication in neural development and brain disorders. *Biomed Res Int*, 2014, 642798.  
658 doi:10.1155/2014/642798
- 659 Bagley, J. A., Reumann, D., Bian, S., Levi-Strauss, J., & Knoblich, J. A. (2017). Fused cerebral organoids model  
660 interactions between brain regions. *Nat Methods*, 14(7), 743-751. doi:10.1038/nmeth.4304
- 661 Bandtlow, C. E., & Zimmermann, D. R. (2000). Proteoglycans in the developing brain: new conceptual insights for  
662 old proteins. *Physiol Rev*, 80(4), 1267-1290. doi:10.1152/physrev.2000.80.4.1267
- 663 Barros, C. S., Franco, S. J., & Muller, U. (2011). Extracellular matrix: functions in the nervous system. *Cold Spring*  
664 *Harb Perspect Biol*, 3(1), a005108. doi:10.1101/cshperspect.a005108
- 665 Birey, F., Andersen, J., Makinson, C. D., Islam, S., Wei, W., Huber, N., . . . Pasca, S. P. (2017). Assembly of functionally  
666 integrated human forebrain spheroids. *Nature*, 545(7652), 54-59. doi:10.1038/nature22330
- 667 Bissell, M. J., Hall, H. G., & Parry, G. (1982). How does the extracellular matrix direct gene expression? *J Theor Biol*,  
668 99(1), 31-68.
- 669 Blanco, J. A., Stead, M., Krieger, A., Viventi, J., Marsh, W. R., Lee, K. H., . . . Litt, B. (2010). Unsupervised classification  
670 of high-frequency oscillations in human neocortical epilepsy and control patients. *J Neurophysiol*, 104(5),  
671 2900-2912. doi:10.1152/jn.01082.2009
- 672 Blondel, V. D., Guillaume, J.-L., Lambiotte, R., & Lefebvre, E. (2008). Fast unfolding of communities in large  
673 networks. *Journal of Statistical Mechanics: Theory and Experiment*, 2008(10), P10008. doi:10.1088/1742-  
674 5468/2008/10/p10008
- 675 Burchett, M. E., Ling, I. F., & Estus, S. (2011). FBN1 isoform expression varies in a tissue and development-specific  
676 fashion. *Biochem Biophys Res Commun*, 411(2), 323-328. doi:10.1016/j.bbrc.2011.06.140
- 677 Cairns, D. M., Chwalek, K., Moore, Y. E., Kelley, M. R., Abbott, R. D., Moss, S., & Kaplan, D. L. (2016). Expandable  
678 and Rapidly Differentiating Human Induced Neural Stem Cell Lines for Multiple Tissue Engineering  
679 Applications. *Stem Cell Reports*, 7(3), 557-570. doi:10.1016/j.stemcr.2016.07.017
- 680 Calabro, A., Benavides, M., Tammi, M., Hascall, V. C., & Midura, R. J. (2000). Microanalysis of enzyme digests of  
681 hyaluronan and chondroitin/dermatan sulfate by fluorophore-assisted carbohydrate electrophoresis  
682 (FACE). *Glycobiology*, 10(3), 273-281.
- 683 Calabro, A., Midura, R., Wang, A., West, L., Plaas, A., & Hascall, V. C. (2001). Fluorophore-assisted carbohydrate  
684 electrophoresis (FACE) of glycosaminoglycans. *Osteoarthritis Cartilage*, 9 Suppl A, S16-22.
- 685 Camp, J. G., Badsha, F., Florio, M., Kanton, S., Gerber, T., Wilsch-Brauninger, M., . . . Treutlein, B. (2015). Human  
686 cerebral organoids recapitulate gene expression programs of fetal neocortex development. *Proc Natl*  
687 *Acad Sci U S A*, 112(51), 15672-15677. doi:10.1073/pnas.1520760112
- 688 Charles, N. A., Holland, E. C., Gilbertson, R., Glass, R., & Kettenmann, H. (2012). The brain tumor  
689 microenvironment. *Glia*, 60(3), 502-514.
- 690 Choi, S. S., Lee, H. J., Lim, I., Satoh, J., & Kim, S. U. (2014). Human astrocytes: secretome profiles of cytokines and  
691 chemokines. *PLoS One*, 9(4), e92325. doi:10.1371/journal.pone.0092325
- 692 Chung, W. S., Allen, N. J., & Eroglu, C. (2015). Astrocytes Control Synapse Formation, Function, and Elimination.  
693 *Cold Spring Harb Perspect Biol*, 7(9), a020370. doi:10.1101/cshperspect.a020370
- 694 Chwalek, K., Sood, D., Cantley, W. L., White, J. D., Tang-Schomer, M., & Kaplan, D. L. (2015). Engineered 3D Silk-  
695 collagen-based Model of Polarized Neural Tissue. *J Vis Exp*(105), e52970. doi:10.3791/52970
- 696 Chwalek, K., Tang-Schomer, M. D., Omenetto, F. G., & Kaplan, D. L. (2015). In vitro bioengineered model of cortical  
697 brain tissue. *Nat Protoc*, 10(9), 1362-1373. doi:10.1038/nprot.2015.091

- 698 Clarke, L. E., Liddel, S. A., Chakraborty, C., Munch, A. E., Heiman, M., & Barres, B. A. (2018). Normal aging  
699 induces A1-like astrocyte reactivity. *Proc Natl Acad Sci U S A*, *115*(8), E1896-E1905.  
700 doi:10.1073/pnas.1800165115
- 701 Cua, R. C., Lau, L. W., Keough, M. B., Midha, R., Apte, S. S., & Yong, V. W. (2013). Overcoming neurite-inhibitory  
702 chondroitin sulfate proteoglycans in the astrocyte matrix. *Glia*, *61*(6), 972-984. doi:10.1002/glia.22489
- 703 Cullen, D. K., Stabenfeldt, S. E., Simon, C. M., Tate, C. C., & LaPlaca, M. C. (2007). In vitro neural injury model for  
704 optimization of tissue-engineered constructs. *J Neurosci Res*, *85*(16), 3642-3651. doi:10.1002/jnr.21434
- 705 Dana, H., Mohar, B., Sun, Y., Narayan, S., Gordus, A., Hasseman, J. P., . . . Kim, D. S. (2016). Sensitive red protein  
706 calcium indicators for imaging neural activity. *Elife*, *5*. doi:10.7554/eLife.12727
- 707 Dauth, S., Grevesse, T., Pantazopoulos, H., Campbell, P. H., Maoz, B. M., Berretta, S., & Parker, K. K. (2016).  
708 Extracellular matrix protein expression is brain region dependent. *J Comp Neurol*, *524*(7), 1309-1336.  
709 doi:10.1002/cne.23965
- 710 de la Torre-Ubieta, L., Won, H., Stein, J. L., & Geschwind, D. H. (2016). Advancing the understanding of autism  
711 disease mechanisms through genetics. *Nat Med*, *22*(4), 345-361. doi:10.1038/nm.4071
- 712 De Waele, J., Reekmans, K., Daans, J., Goossens, H., Berneman, Z., & Ponsaerts, P. (2015). 3D culture of murine  
713 neural stem cells on decellularized mouse brain sections. *Biomaterials*, *41*, 122-131.  
714 doi:10.1016/j.biomaterials.2014.11.025
- 715 DeQuach, J. A., Mezzano, V., Miglani, A., Lange, S., Keller, G. M., Sheikh, F., & Christman, K. L. (2010). Simple and  
716 high yielding method for preparing tissue specific extracellular matrix coatings for cell culture. *PLoS One*,  
717 *5*(9), e13039. doi:10.1371/journal.pone.0013039
- 718 Dityatev, A., Seidenbecher, C. I., & Schachner, M. (2010). Compartmentalization from the outside: the extracellular  
719 matrix and functional microdomains in the brain. *Trends Neurosci*, *33*(11), 503-512.  
720 doi:10.1016/j.tins.2010.08.003
- 721 Funa, K., & Sasahara, M. (2014). The Roles of PDGF in Development and During Neurogenesis in the Normal and  
722 Diseased Nervous System. *Journal of Neuroimmune Pharmacology*, *9*(2), 168-181. doi:10.1007/s11481-  
723 013-9479-z
- 724 Giandomenico, S. L., & Lancaster, M. A. (2017). Probing human brain evolution and development in organoids.  
725 *Curr Opin Cell Biol*, *44*, 36-43. doi:10.1016/j.ceb.2017.01.001
- 726 Gowing, G., Shelley, B., Staggenborg, K., Hurley, A., Avalos, P., Victoroff, J., . . . Svendsen, C. N. (2014). Glial cell  
727 line-derived neurotrophic factor-secreting human neural progenitors show long-term survival, maturation  
728 into astrocytes, and no tumor formation following transplantation into the spinal cord of  
729 immunocompromised rats. *Neuroreport*, *25*(6), 367-372. doi:10.1097/Wnr.0000000000000092
- 730 Hoshiba, T., Chen, G., Endo, C., Maruyama, H., Wakui, M., Nemoto, E., . . . Tanaka, M. (2016). Decellularized  
731 Extracellular Matrix as an In Vitro Model to Study the Comprehensive Roles of the ECM in Stem Cell  
732 Differentiation. *Stem Cells Int*, *2016*, 6397820. doi:10.1155/2016/6397820
- 733 Hua, J. Y., & Smith, S. J. (2004). Neural activity and the dynamics of central nervous system development. *Nat*  
734 *Neurosci*, *7*(4), 327-332. doi:10.1038/nn1218
- 735 Hughes, C. S., Postovit, L. M., & Lajoie, G. A. (2010). Matrigel: a complex protein mixture required for optimal  
736 growth of cell culture. *Proteomics*, *10*(9), 1886-1890. doi:10.1002/pmic.200900758
- 737 Hynes, R. O. (2012). The evolution of metazoan extracellular matrix. *J Cell Biol*, *196*(6), 671-679.  
738 doi:10.1083/jcb.201109041
- 739 Kamat, P. K., Swarnkar, S., Rai, S., Kumar, V., & Tyagi, N. (2014). Astrocyte mediated MMP-9 activation in the  
740 synapse dysfunction: An implication in Alzheimer disease. *Ther Targets Neurol Dis*, *1*(1).  
741 doi:10.14800/ttnd.243
- 742 Kamioka, H., Maeda, E., Jimbo, Y., Robinson, H. P., & Kawana, A. (1996). Spontaneous periodic synchronized  
743 bursting during formation of mature patterns of connections in cortical cultures. *Neurosci Lett*, *206*(2-3),  
744 109-112.

- 745 Kapucu, F. E., Tanskanen, J. M., Mikkonen, J. E., Yla-Outinen, L., Narkilahti, S., & Hyttinen, J. A. (2012). Burst analysis  
746 tool for developing neuronal networks exhibiting highly varying action potential dynamics. *Front Comput*  
747 *Neurosci*, 6, 38. doi:10.3389/fncom.2012.00038
- 748 Katrekar, D., Moreno, A. M., Chen, G., Worlikar, A., & Mali, P. (2018). Oligonucleotide conjugated multi-functional  
749 adeno-associated viruses. *Sci Rep*, 8(1), 3589. doi:10.1038/s41598-018-21742-x
- 750 Kim, S. M., Long, D. W., Tsang, M. W. K., & Wang, Y. (2018). Zebrafish extracellular matrix improves neuronal  
751 viability and network formation in a 3-dimensional culture. *Biomaterials*, 170, 137-146.  
752 doi:10.1016/j.biomaterials.2018.04.009
- 753 Kim, Y. H., Choi, S. H., D'Avanzo, C., Hebisch, M., Sliwinski, C., Bylykbashi, E., . . . Kim, D. Y. (2015). A 3D human  
754 neural cell culture system for modeling Alzheimer's disease. *Nat Protoc*, 10(7), 985-1006.  
755 doi:10.1038/nprot.2015.065
- 756 Krencik, R., van Asperen, J. V., & Ullian, E. M. (2017). Human astrocytes are distinct contributors to the complexity  
757 of synaptic function. *Brain Res Bull*, 129, 66-73. doi:10.1016/j.brainresbull.2016.08.012
- 758 Lancaster, M. A., Corsini, N. S., Wolfinger, S., Gustafson, E. H., Phillips, A. W., Burkard, T. R., . . . Knoblich, J. A.  
759 (2017). Guided self-organization and cortical plate formation in human brain organoids. *Nat Biotechnol*,  
760 35(7), 659-666. doi:10.1038/nbt.3906
- 761 Lancaster, M. A., Renner, M., Martin, C. A., Wenzel, D., Bicknell, L. S., Hurles, M. E., . . . Knoblich, J. A. (2013).  
762 Cerebral organoids model human brain development and microcephaly. *Nature*, 501(7467), 373-379.  
763 doi:10.1038/nature12517
- 764 Lancichinetti, A., & Fortunato, S. (2012). Consensus clustering in complex networks. *Sci Rep*, 2, 336.  
765 doi:10.1038/srep00336
- 766 Lee, S., Park, J. Y., Lee, W. H., Kim, H., Park, H. C., Mori, K., & Suk, K. (2009). Lipocalin-2 is an autocrine mediator  
767 of reactive astrocytosis. *J Neurosci*, 29(1), 234-249. doi:10.1523/JNEUROSCI.5273-08.2009
- 768 Lian, H., & Zheng, H. (2016). Signaling pathways regulating neuron-glia interaction and their implications in  
769 Alzheimer's disease. *J Neurochem*, 136(3), 475-491. doi:10.1111/jnc.13424
- 770 Liddelow, S. A., & Barres, B. A. (2017). Reactive Astrocytes: Production, Function, and Therapeutic Potential.  
771 *Immunity*, 46(6), 957-967. doi:10.1016/j.immuni.2017.06.006
- 772 Liddelow, S. A., Guttenplan, K. A., Clarke, L. E., Bennett, F. C., Bohlen, C. J., Schirmer, L., . . . Barres, B. A. (2017).  
773 Neurotoxic reactive astrocytes are induced by activated microglia. *Nature*, 541(7638), 481-487.  
774 doi:10.1038/nature21029
- 775 Luo, C., Lancaster, M. A., Castanon, R., Nery, J. R., Knoblich, J. A., & Ecker, J. R. (2016). Cerebral Organoids  
776 Recapitulate Epigenomic Signatures of the Human Fetal Brain. *Cell Rep*, 17(12), 3369-3384.  
777 doi:10.1016/j.celrep.2016.12.001
- 778 Mariani, J., Coppola, G., Zhang, P., Abyzov, A., Provini, L., Tomasini, L., . . . Vaccarino, F. M. (2015). FOXP1-  
779 Dependent Dysregulation of GABA/Glutamate Neuron Differentiation in Autism Spectrum Disorders. *Cell*,  
780 162(2), 375-390. doi:10.1016/j.cell.2015.06.034
- 781 Marton, R. M., Miura, Y., Sloan, S. A., Li, Q., Revah, O., Levy, R. J., . . . Pasca, S. P. (2019). Differentiation and  
782 maturation of oligodendrocytes in human three-dimensional neural cultures. *Nat Neurosci*, 22(3), 484-  
783 491. doi:10.1038/s41593-018-0316-9
- 784 Medberry, C. J., Crapo, P. M., Siu, B. F., Carruthers, C. A., Wolf, M. T., Nagarkar, S. P., . . . Badylak, S. F. (2013).  
785 Hydrogels derived from central nervous system extracellular matrix. *Biomaterials*, 34(4), 1033-1040.  
786 doi:10.1016/j.biomaterials.2012.10.062
- 787 Midura, R. J., Cali, V., Lauer, M. E., Calabro, A., & Hascall, V. C. (2018). Quantification of hyaluronan (HA) using a  
788 simplified fluorophore-assisted carbohydrate electrophoresis (FACE) procedure. *Methods Cell Biol*, 143,  
789 297-316. doi:10.1016/bs.mcb.2017.08.017
- 790 Miyata, S., & Kitagawa, H. (2017). Formation and remodeling of the brain extracellular matrix in neural plasticity:  
791 Roles of chondroitin sulfate and hyaluronan. *Biochim Biophys Acta*, 1861(10), 2420-2434.  
792 doi:10.1016/j.bbagen.2017.06.010

- 793 Mizuno, H., Warita, H., Aoki, M., & Itoyama, Y. (2008). Accumulation of chondroitin sulfate proteoglycans in the  
794 microenvironment of spinal motor neurons in amyotrophic lateral sclerosis transgenic rats. *J Neurosci Res*,  
795 *86*(11), 2512-2523. doi:10.1002/jnr.21702
- 796 Mueller, A. L., Davis, A., Sovich, S., Carlson, S. S., & Robinson, F. R. (2016). Distribution of N-Acetylgalactosamine-  
797 Positive Perineuronal Nets in the Macaque Brain: Anatomy and Implications. *Neural Plasticity*, *2016*,  
798 6021428. doi:10.1155/2016/6021428
- 799 Nastase, M. V., Young, M. F., & Schaefer, L. (2012). Biglycan: a multivalent proteoglycan providing structure and  
800 signals. *J Histochem Cytochem*, *60*(12), 963-975. doi:10.1369/0022155412456380
- 801 Nedergaard, M., Ransom, B., & Goldman, S. A. (2003). New roles for astrocytes: redefining the functional  
802 architecture of the brain. *Trends Neurosci*, *26*(10), 523-530. doi:10.1016/j.tins.2003.08.008
- 803 Pantazopoulos, H., Woo, T. U., Lim, M. P., Lange, N., & Berretta, S. (2010). Extracellular matrix-glia abnormalities  
804 in the amygdala and entorhinal cortex of subjects diagnosed with schizophrenia. *Arch Gen Psychiatry*,  
805 *67*(2), 155-166. doi:10.1001/archgenpsychiatry.2009.196
- 806 Pasca, A. M., Sloan, S. A., Clarke, L. E., Tian, Y., Makinson, C. D., Huber, N., . . . Pasca, S. P. (2015). Functional cortical  
807 neurons and astrocytes from human pluripotent stem cells in 3D culture. *Nat Methods*, *12*(7), 671-678.  
808 doi:10.1038/nmeth.3415
- 809 Pasca, S. P. (2016). Personalized Human Cortical Spheroids. *Am J Psychiatry*, *173*(4), 332-333.  
810 doi:10.1176/appi.ajp.2016.16020133
- 811 Pasca, S. P. (2018). The rise of three-dimensional human brain cultures. *Nature*, *553*(7689), 437-445.  
812 doi:10.1038/nature25032
- 813 Quadrato, G., Brown, J., & Arlotta, P. (2016). The promises and challenges of human brain organoids as models of  
814 neuropsychiatric disease. *Nat Med*, *22*(11), 1220-1228. doi:10.1038/nm.4214
- 815 Quadrato, G., Nguyen, T., Macosko, E. Z., Sherwood, J. L., Min Yang, S., Berger, D. R., . . . Arlotta, P. (2017). Cell  
816 diversity and network dynamics in photosensitive human brain organoids. *Nature*, *545*(7652), 48-53.  
817 doi:10.1038/nature22047
- 818 Rama Rao, K. V., & Kielian, T. (2015). Neuron-astrocyte interactions in neurodegenerative diseases: Role of  
819 neuroinflammation. *Clin Exp Neuroimmunol*, *6*(3), 245-263. doi:10.1111/cen3.12237
- 820 Risher, W. C., & Eroglu, C. (2012). Thrombospondins as key regulators of synaptogenesis in the central nervous  
821 system. *Matrix Biology*, *31*(3), 170-177. doi:10.1016/j.matbio.2012.01.004
- 822 Rosenberg, S. S., & Spitzer, N. C. (2011). Calcium signaling in neuronal development. *Cold Spring Harb Perspect*  
823 *Biol*, *3*(10), a004259. doi:10.1101/cshperspect.a004259
- 824 Salmina, A. B. (2009). Neuron-glia interactions as therapeutic targets in neurodegeneration. *J Alzheimers Dis*,  
825 *16*(3), 485-502. doi:10.3233/JAD-2009-0988
- 826 Schuldiner, M., Eiges, R., Eden, A., Yanuka, O., Itskovitz-Eldor, J., Goldstein, R. S., & Benvenisty, N. (2001). Induced  
827 neuronal differentiation of human embryonic stem cells. *Brain Res*, *913*(2), 201-205.
- 828 Siebert, J. R., Conta Steencken, A., & Osterhout, D. J. (2014). Chondroitin sulfate proteoglycans in the nervous  
829 system: inhibitors to repair. *Biomed Res Int*, *2014*, 845323. doi:10.1155/2014/845323
- 830 Sloan, S. A., Darmanis, S., Huber, N., Khan, T. A., Birey, F., Caneda, C., . . . Pasca, S. P. (2017). Human Astrocyte  
831 Maturation Captured in 3D Cerebral Cortical Spheroids Derived from Pluripotent Stem Cells. *Neuron*,  
832 *95*(4), 779-790 e776. doi:10.1016/j.neuron.2017.07.035
- 833 Sood, D., Chawalek, K., Stuntz, E., Pouli, D., Du, C., Tang-Schomer, M., . . . Kaplan, D. L. (2015). Fetal brain  
834 extracellular matrix boosts neuronal network formation in 3D bioengineered model of cortical brain  
835 tissue. *ACS Biomaterials Science & Engineering*, *2*(1), 131-140.
- 836 Tang-Schomer, M. D., Jackvony, T., & Santaniello, S. (2018). Cortical Network Synchrony Under Applied Electrical  
837 Field in vitro. *Front Neurosci*, *12*, 630. doi:10.3389/fnins.2018.00630
- 838 Vacher, H., Mohapatra, D. P., & Trimmer, J. S. (2008). Localization and targeting of voltage-dependent ion channels  
839 in mammalian central neurons. *Physiol Rev*, *88*(4), 1407-1447. doi:10.1152/physrev.00002.2008



- 840 Velasco, S., Kedaigle, A. J., Simmons, S. K., Nash, A., Rocha, M., Quadrato, G., . . . Arlotta, P. (2019). Individual brain  
841 organoids reproducibly form cell diversity of the human cerebral cortex. *Nature*, *570*(7762), 523-527.  
842 doi:10.1038/s41586-019-1289-x
- 843 Watson, P. M. D., Kavanagh, E., Allenby, G., & Vassey, M. (2017). Bioengineered 3D Glial Cell Culture Systems and  
844 Applications for Neurodegeneration and Neuroinflammation. *SLAS Discov*, *22*(5), 583-601.  
845 doi:10.1177/2472555217691450
- 846 Wiese, S., Karus, M., & Faissner, A. (2012). Astrocytes as a source for extracellular matrix molecules and cytokines.  
847 *Front Pharmacol*, *3*, 120. doi:10.3389/fphar.2012.00120
- 848 Williams, C., Quinn, K. P., Georgakoudi, I., & Black, L. D., 3rd. (2014). Young developmental age cardiac  
849 extracellular matrix promotes the expansion of neonatal cardiomyocytes in vitro. *Acta Biomater*, *10*(1),  
850 194-204. doi:10.1016/j.actbio.2013.08.037
- 851 Wiranowska, M., & Rojiani, M. V. (2011). *Extracellular Matrix Microenvironment in Glioma Progression*: INTECH  
852 Open Access Publisher.
- 853 Yu, P., Wang, H., Katagiri, Y., & Geller, H. M. (2012). An in vitro model of reactive astrogliosis and its effect on  
854 neuronal growth. *Methods Mol Biol*, *814*, 327-340. doi:10.1007/978-1-61779-452-0\_21
- 855 Zamanian, J. L., Xu, L., Foo, L. C., Nouri, N., Zhou, L., Giffard, R. G., & Barres, B. A. (2012). Genomic analysis of  
856 reactive astrogliosis. *J Neurosci*, *32*(18), 6391-6410. doi:10.1523/JNEUROSCI.6221-11.2012
- 857 Zimmermann, D. R., & Dours-Zimmermann, M. T. (2008). Extracellular matrix of the central nervous system: from  
858 neglect to challenge. *Histochem Cell Biol*, *130*(4), 635-653. doi:10.1007/s00418-008-0485-9

859

860



861 **Supplementary Methods**

862 **Biochemical Assays**

863 **Viability Assay:** Cell proliferation reagent WST-1 assay (Sigma-Aldrich) was performed at end  
864 time points before freezing the samples for PCR, according to the instructions provided by the  
865 manufacturer, to assess overall cell viability across different ECM conditions. Briefly, the samples were  
866 incubated for 1 h with WST-1 reagent diluted 1:10 (v:v) in culture medium, followed by a reading of the  
867 medium absorbance with plate reader (Molecular Devices) at 450 and 600 nm as the reference wavelength.  
868 Fresh medium was used as a baseline control and its average absorbance was subtracted from the value of  
869 the samples.

870 **Lactate Dehydrogenase Assay:** Lactate dehydrogenase (LDH) enzyme released into media by  
871 the ruptured cells, was used as a measure of cell death at different time points during the 3D culture  
872 without having to sacrifice the samples. LDH assay was performed according to the manufacturer  
873 instructions (Sigma-Aldrich). Briefly, culture medium was mixed with the assay reagents in a 1:2 ratio.  
874 Following 30 mins incubation at room temperature, the reaction was stopped by addition of 1N HCl. The  
875 absorbance readings were measured at 490 nm and 690 nm as the reference wavelengths. Fresh medium  
876 without any construct was used as a baseline control and its average was subtracted from the sample  
877 values.

878 **CSPG Release ELISA:** CSPGs released by the differentiating hiNSCs in media were measured  
879 using an ELISA based assay. Media samples from the 3D constructs were incubated overnight at 4°C in  
880 a 96-well immuno plate (Thermo Fischer Scientific). Alongside the sample media incubation, chicken  
881 extracellular CSPGs (Millipore) were used over a range of serial dilutions for the generation of standard  
882 curves. Following washes with PBS-tween, monoclonal anti-chondroitin sulfate antibody produced in

883 mouse/clone CS-56, ascites fluid (Sigma) was added for overnight incubation at 4°C. After the next round  
884 of washes, HRP conjugated goat anti-mouse secondary antibody (Abcam) was incubated at room  
885 temperature for 2 h. TMB (3,3',5,5'-tetramethylbenzidine) 1-C Substrate (Fisher Scientific) was  
886 introduced following the last round of washes with PBS-Tween. Finally, after the color developed for 10  
887 mins at room temperature, the reaction was stopped with 1N HCl. The absorbance readings were measured  
888 at 450 nm wavelength and the fresh media readings were subtracted from the sample readings. The  
889 standard curve was utilized for calculating the quantities of CSPGs released in the different conditions  
890 and reported in pg/ml.

### 891 **qRT-PCR**

892 Samples were flash frozen in liquid nitrogen and stored in -80oC in individual Eppendorf tubes  
893 until RNA extraction was performed. All samples were placed on dry ice during extraction, sequentially  
894 disrupted using a liquid nitrogen chilled bio-pulverizer. Between each sample, the pulverizer was wiped  
895 with 70% ethanol to remove remnants of the previous sample, and between each sample set (different  
896 tumor types), all the tools were cleaned with RNAzap. Lysis buffer was immediately added to the  
897 powdered frozen sample and placed on ice. Once all the samples were in lysis buffer on ice, a 22 gauge  
898 needle and syringe was used for sample homogenization one by one using a fresh needle and syringe every  
899 time. All the samples were spun down to remove undigested material (mainly silk scaffold) and the  
900 supernatant was transferred to clean RNase free-Eppendorfs. Following this, the SurePrep All Prep kit  
901 (Fisher Scientific) protocol was followed until RNA was eluted from the columns. RNA concentrations  
902 were measured using nanodrop 2000 (Thermo Fisher Scientific). RT2 First Strand Kit with an  
903 incorporated gDNA removal step with buffer GE (Qiagen) was utilized for cDNA synthesis from the  
904 eluted RNA. cDNA samples were mixed with RT<sup>2</sup> SYBR Green Fluor qPCR Mastermix and added to the

905 Qiagen Custom RT2 PCR Array (including a housekeeping gene, genomic DNA control and RT control).  
906 PCR was run on BioRad CFX96. Table 1 lists the genes that were tested.

### 907 **Cytokine Arrays**

908            Multiplex Quantibody cytokine arrays (RayBiotech) were used to semi-quantitatively compare  
909 cytokines (Table 2) released by differentiating hiNSCs cultured in the 3D bioengineered brain model with  
910 different ECM components. Small volumes of control media samples/cell culture supernatants (50 $\mu$ l) from  
911 the 3D constructs were incubated in the capture antibody spotted glass slides or the membranes, along  
912 with the standards provided that corresponded to known concentrations of the targets for the Quantibody  
913 arrays. This overnight incubation was followed by another overnight step at 4°C, involving the  
914 biotinylated detection antibody cocktail. Next, streptavidin-conjugated fluorophore or HRP-streptavidin  
915 was added for 1 h at room temperature. Finally, the slide was disassembled from the removable gasket,  
916 dried and scanned using a fluorescence microarray laser scanner (Ray Biotech). Protein expression  
917 profiles of the differentiating hiNSCs across the varying ECM conditions were quantified using the Q-  
918 analyzer software (Ray Biotech). Table 2 lists the cytokines that were tested.

919

### 920 **Supplementary Figures**

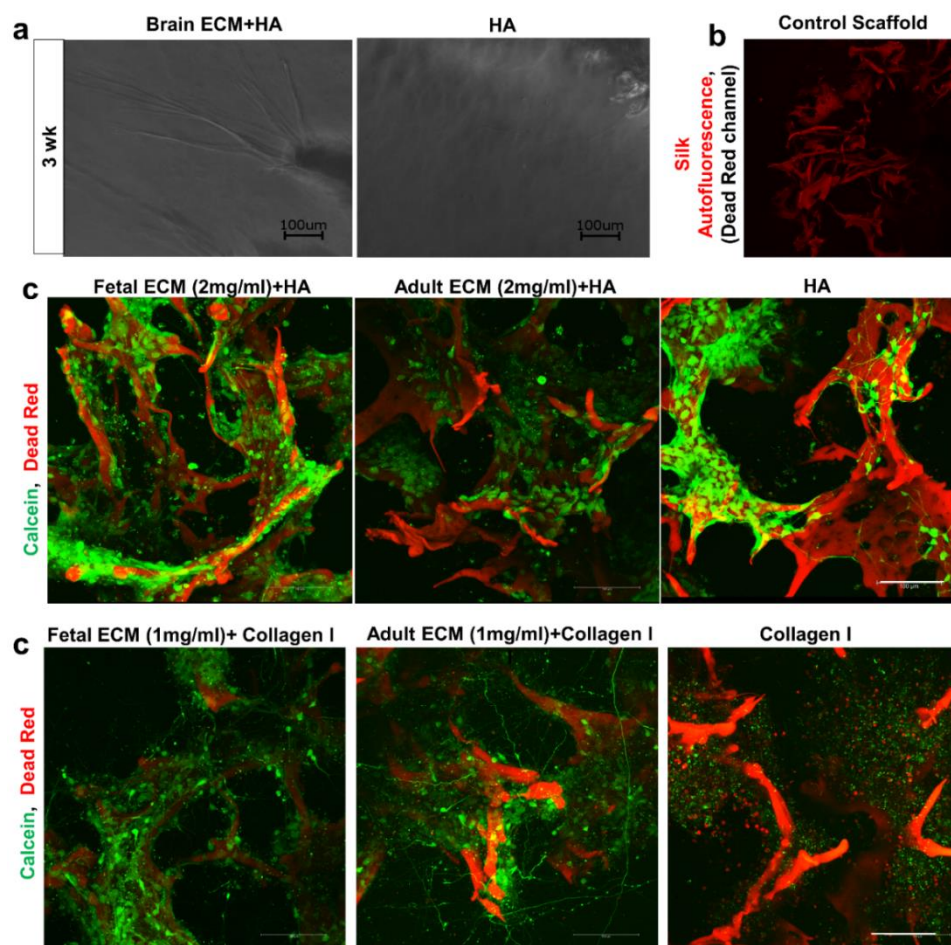

921

922 **Supplementary Figure 1: Collagen I versus hyaluronic acid (HA) based hydrogels for the 3D silk scaffold constructs.**

923 (a) Brightfield images at 3 wk indicating faster ingrowth of axons from differentiating hiNSCs towards the middle hydrogel

924 window of the donut-shaped scaffold, when the HA hydrogel is supplemented with decellularized brain ECM. (b) Silk scaffold

925 without cells to indicate silk autofluorescence in red channel corresponding to Dead Red. (c) Growth of differentiating hiNSCs

926 at 10 days shown by live calcein/dead red staining within the ring portion of the 3D donut-shaped constructs infused with HA

927 based hydrogels supplemented with native porcine brain-derived ECM in comparison to unsupplemented HA hydrogels. Max

928 projection of z-stack, scale bar 100µm. (d) Growth of differentiating hiNSCs at 10 days shown by live calcein/dead red staining

929 within the ring portion of the 3D donut-shaped constructs infused with collagen I based hydrogels supplemented with native

930 porcine brain-derived ECM in comparison to unsupplemented collagen I hydrogels. Max projection of z-stack, scale bar 100µm.

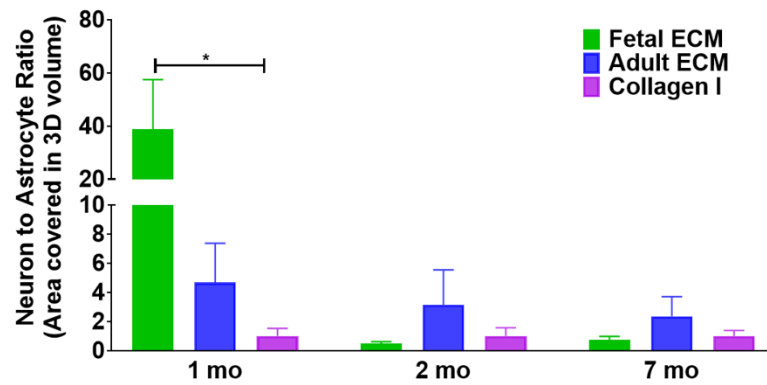

931

932 **Supplementary Figure 2:** Neuron to astrocyte ratio calculated by dividing the total volume in 3D confocal stacks covered by  
933 neurons versus astrocytes post basic image processing. One way ANOVA on log transformed data with Dunnett's posthoc at  
934 each time point,  $p=0.0344$ ,  $n=3-6$ .

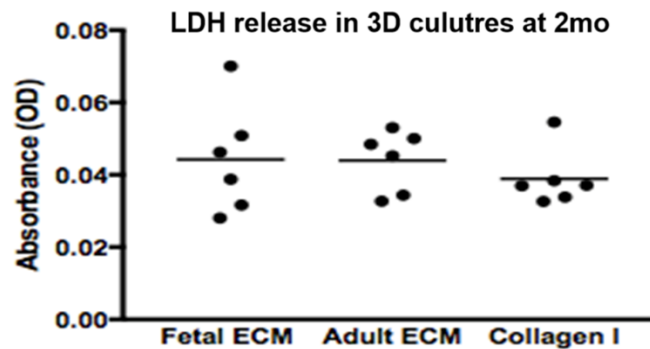

935

936 **Supplementary Figure 3:** Toxicity levels at 2 mo time point in hiNSC 3D cultures as measured by LDH release in media.  
937 No statistical difference (One-way ANOVA) in comparison to collagen I when the cells were grown in the presence of  
938 decellularized ECM.

939

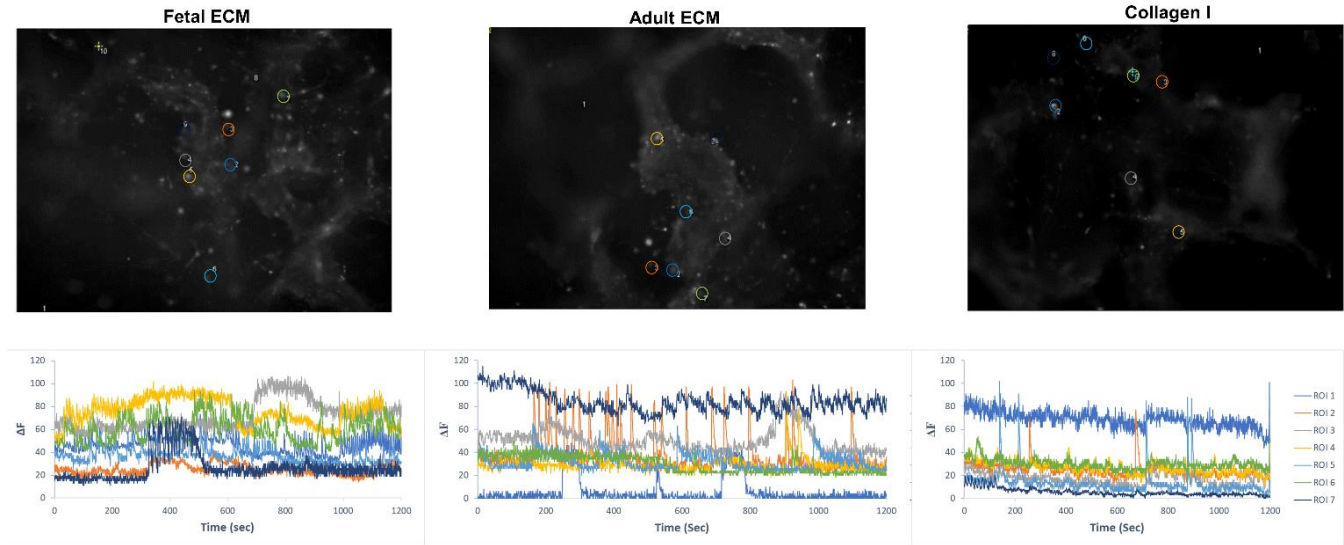

940

941 **Supplementary Figure 4: Calcium imaging of differentiating human neural stem cells in 3D cultures at 3 months.** A few  
942 representative traces of spontaneous calcium activity are plotted corresponding to the regions indicated by circles in the time  
943 max projected image. ROIs were selected manually in Image J.



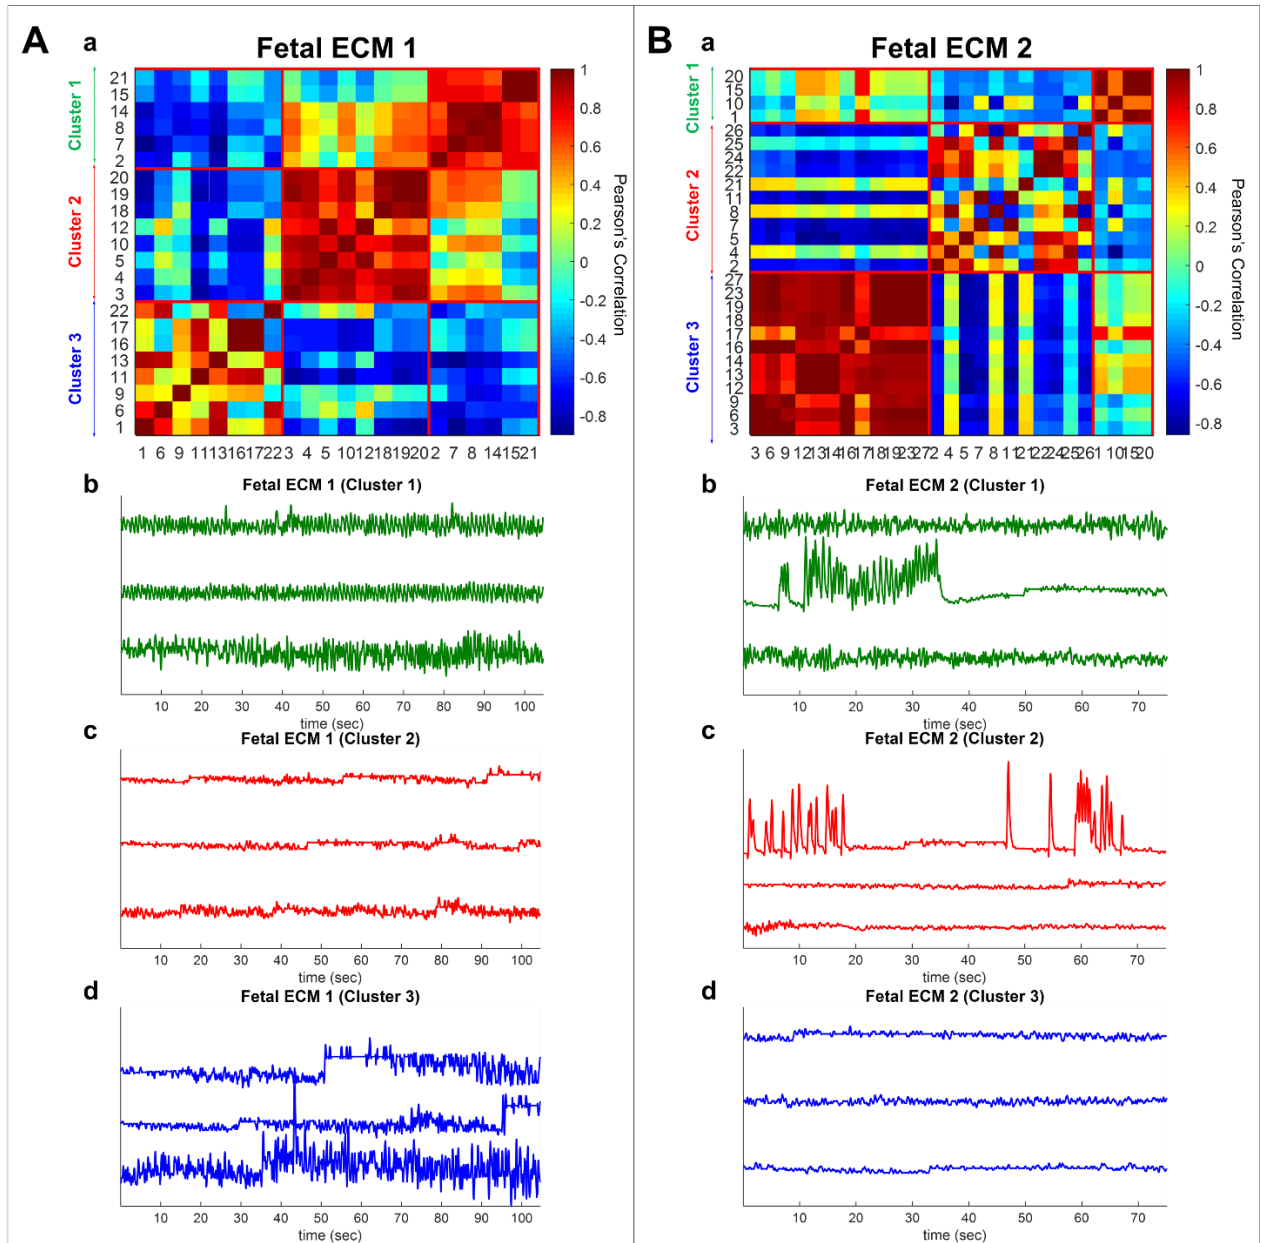

944

945 **Supplementary Figure 5: Spontaneous calcium activity in 3D cultures of differentiating human neural stem cells at 7**  
946 **months; cells from fetal ECM containing constructs.** Tonic oscillatory activity is captured in Cluster 1 (both panel A & B);  
947 sporadic spiking activity is captured in Cluster 3 (panel A) and Cluster 2 (panel B); quiescent state is captured in Cluster 2  
948 (panel A) and Cluster 3 (panel B).

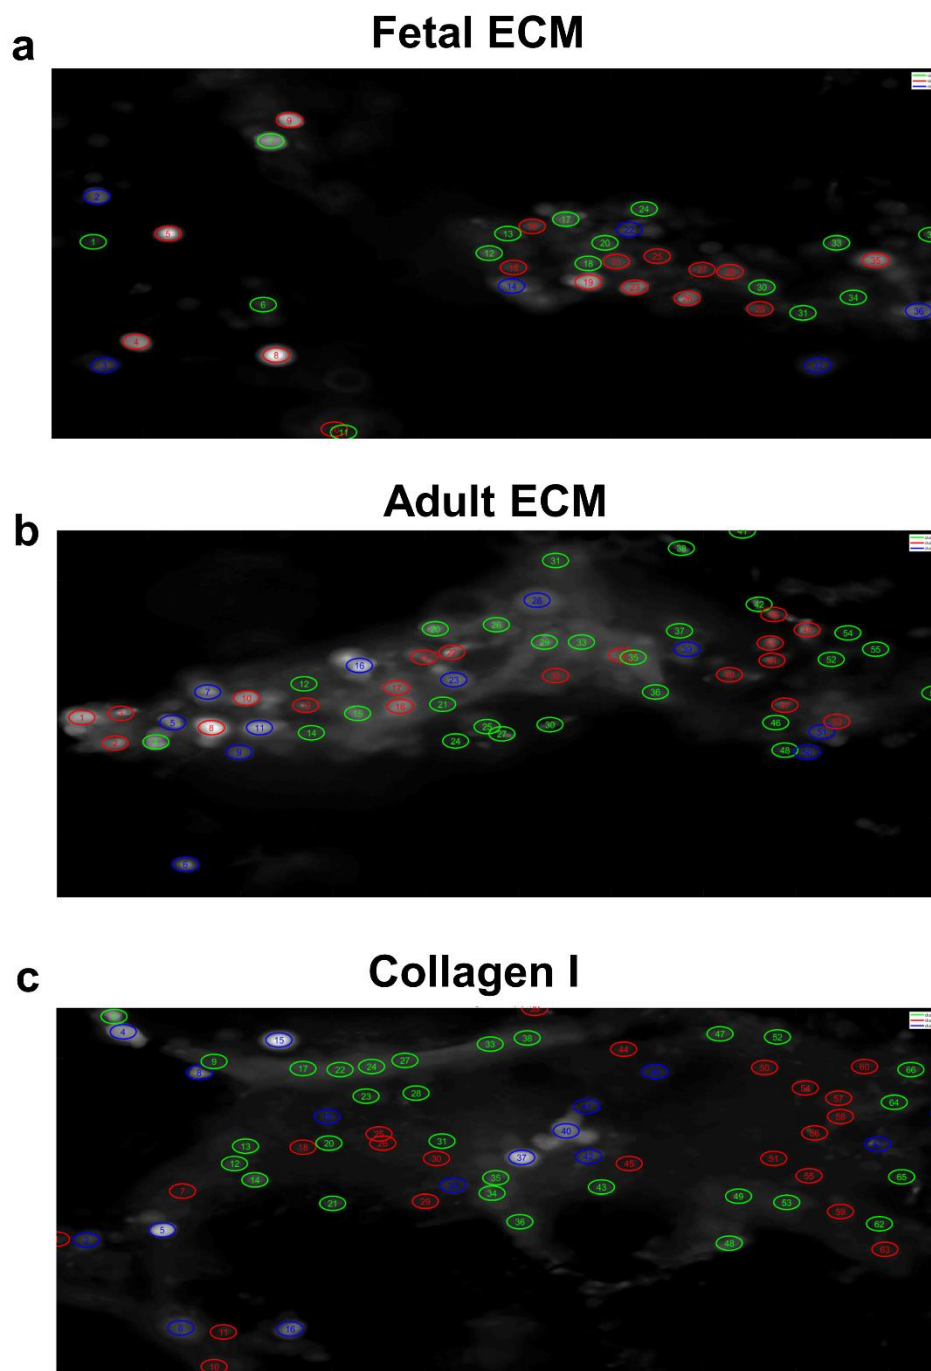

949

950 **Supplementary Figure 6: Spatial location of the ROIs in a 2D frame.** Each ROI is circled and assigned with a unique ID.

951 The color of the circles match the cluster color in Figure 4A (a-d) and the ID values are as reported in Figure 4A (d).

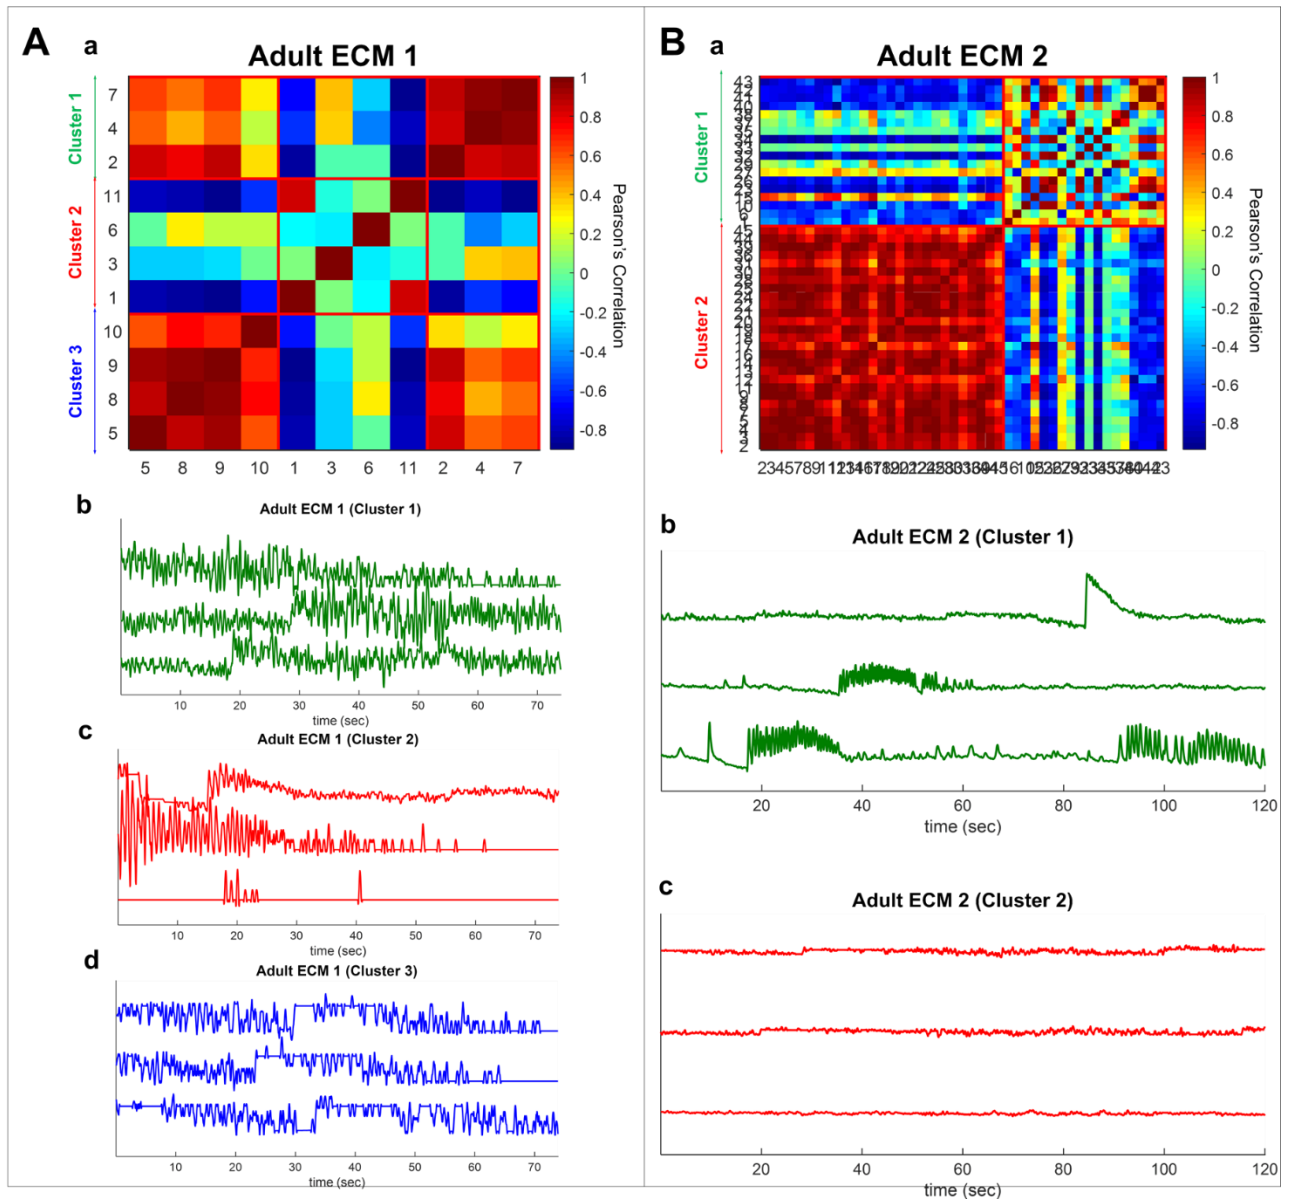

952

953 **Supplementary Figure 7: Spontaneous calcium activity in 3D cultures of differentiating human neural stem cells at 7**  
954 **months; cells from adult ECM containing constructs.** Tonic oscillatory activity is captured in Cluster 1 (panel A only);  
955 sporadic spiking activity is captured in Cluster 2 (panel A) and Cluster 1 (panel B); quiescent state is captured in Cluster 3  
956 (panel A) and Cluster 2 (panel B).

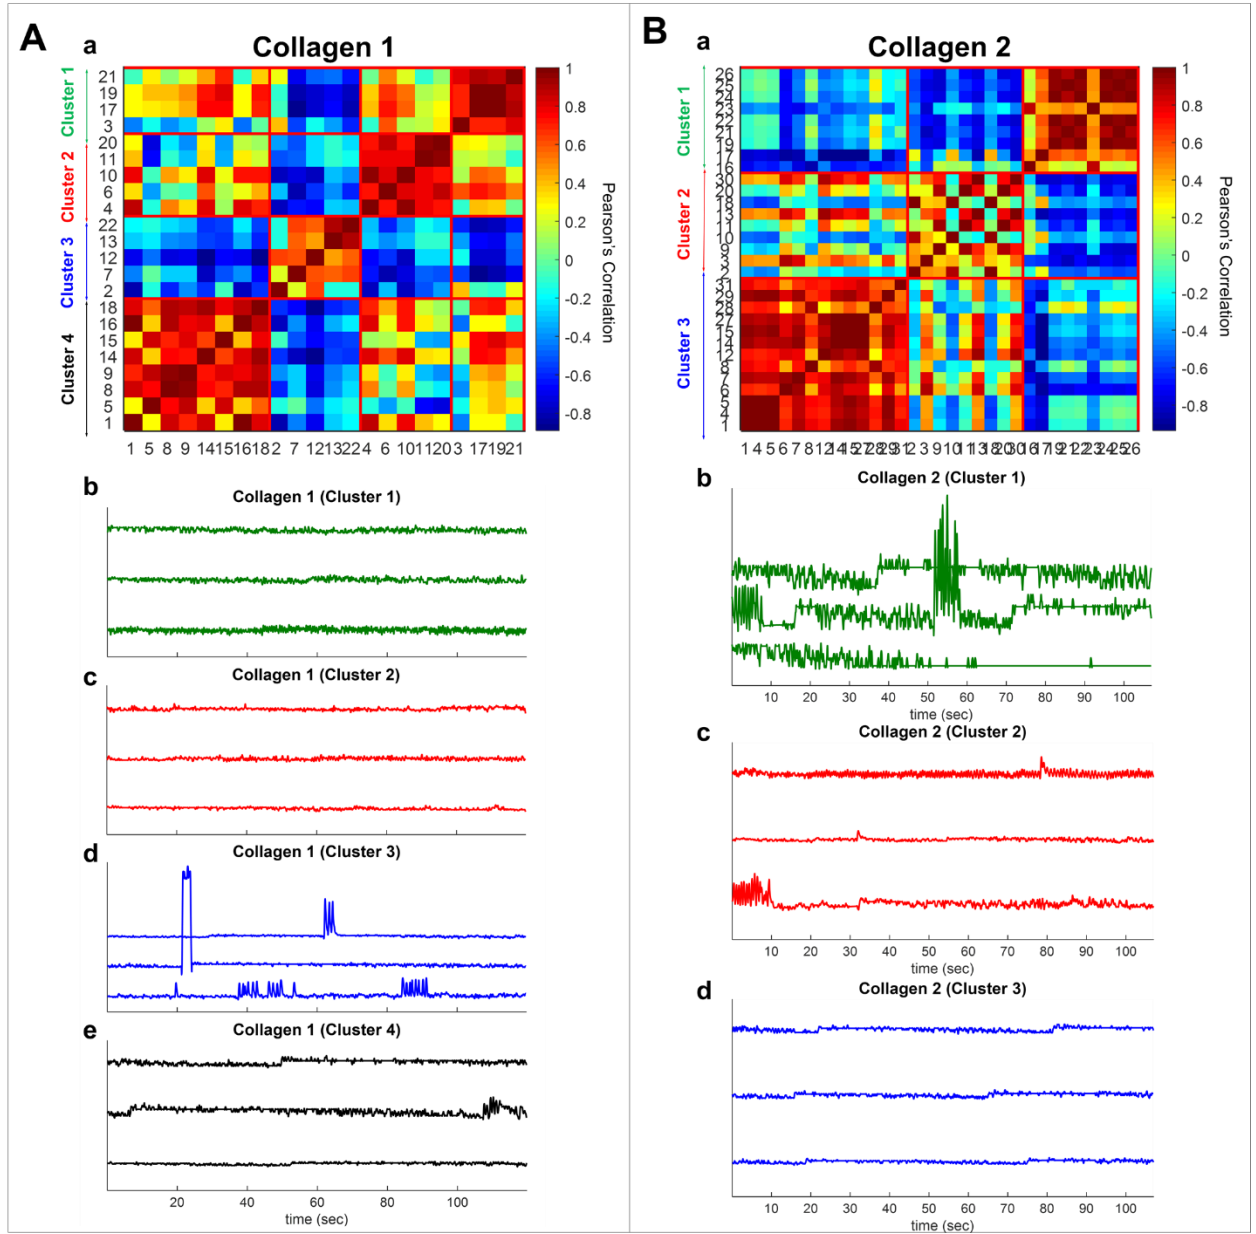

957

958 **Supplementary Figure 8: Spontaneous calcium activity in 3D cultures of differentiating human neural stem cells at 7**  
959 **months; cells from unsupplemented constructs.** Tonic oscillatory activity is captured in Cluster 1 (both panel A & B);  
960 sporadic spiking activity is captured in Cluster 3 (panel A) and Cluster 2 (panel B); quiescent state is captured in Cluster 2 &  
961 4 (panel A) and Cluster 3 (panel B).

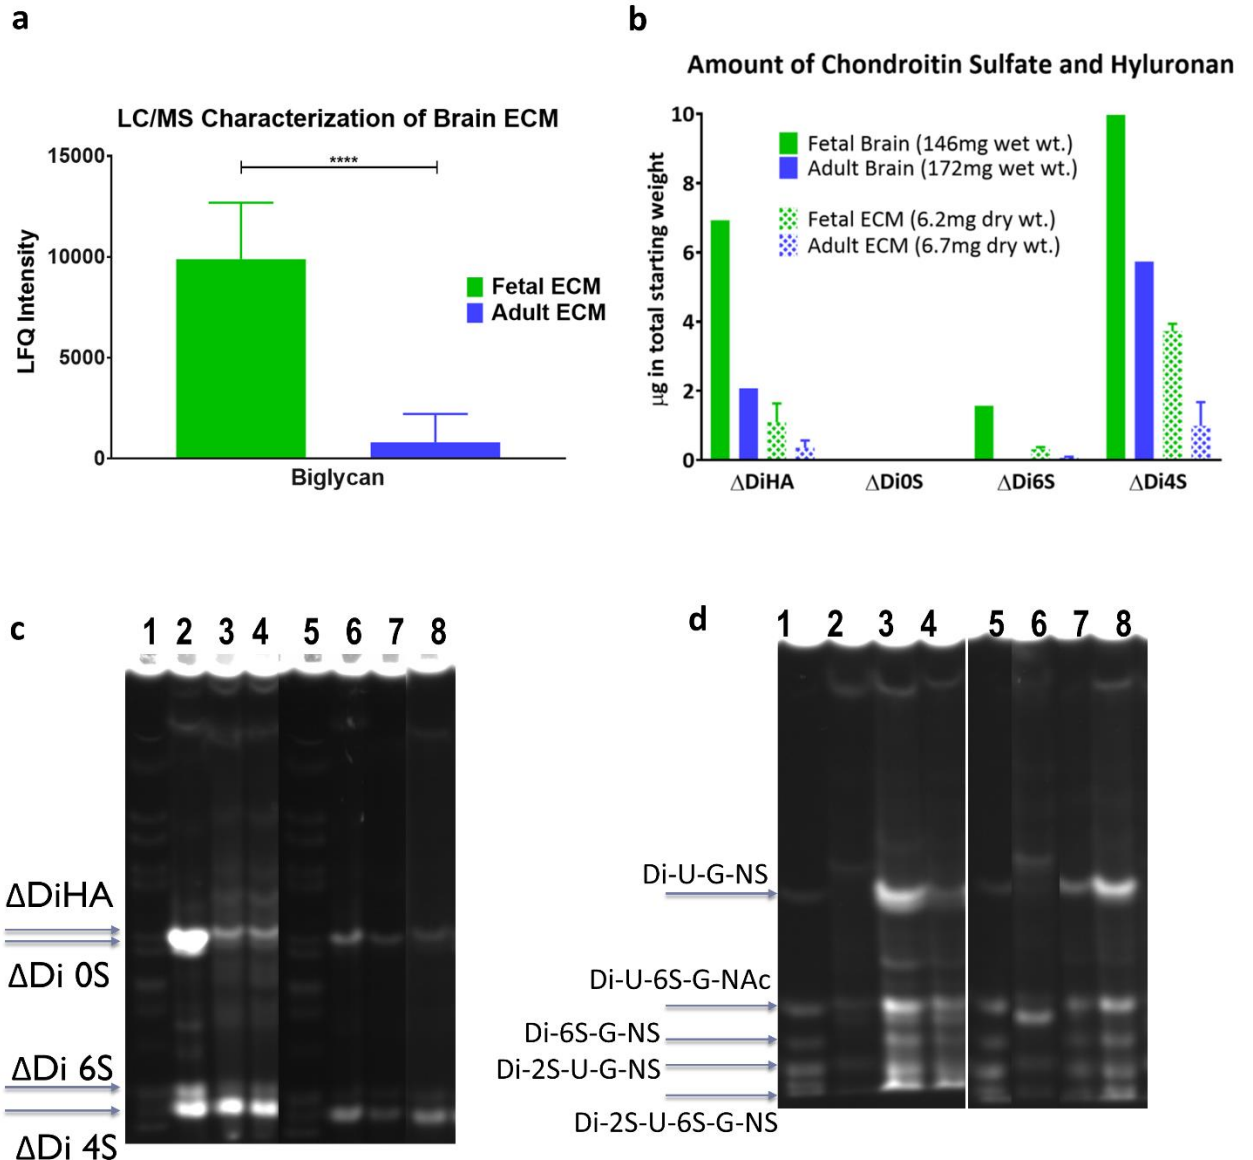

962

963 **Supplementary Figure 9: Characterization of decellularized porcine brain extracellular matrix.** (a) LFQ intensities  
 964 corresponding to biglycan fragments observed in fetal versus adult porcine brain decellularized matrix, following LC/MS  
 965 analysis. Unpaired two-tailed t-test,  $n=3$ ,  $p=0.0073$ . (b) Overall higher quantity of GAGs present in fetal brain, with  
 966 corresponding higher retention in the extracted fetal brain ECM based on FACE analysis. (c) Characterization of decellularized  
 967 fetal & adult brain ECM in comparison to fetal and adult whole brains by FACE. Chondroitin sulfate (CS) and hyaluronan  
 968 (HA) bands in the fetal & adult porcine brain ECM. Lanes 1/5,2,3/4,6,7/8 correspond to standard, fetal brain, fetal ECM, adult  
 969 brain and adult ECM, respectively. (d) Heparin sulfate (HS) bands in the fetal & adult porcine brain ECM over multiple  
 970 extractions.

971 **Supplementary Videos**

972 **Videos 1-1:** Spontaneous calcium activity in 3D cultures of differentiating human neural stem cells at 7 months; cells from a  
973 fetal ECM containing construct. Recorded at 20 frames per sec (fps), video shown at 50fps for 500 frames.

974 **Videos 1-2:** Spontaneous calcium activity in 3D cultures of differentiating human neural stem cells at 7 months; cells from an  
975 adult ECM containing construct. Recorded at 20 frames per sec (fps), video shown at 50fps for 500 frames.

976 **Videos 1-3:** Spontaneous calcium activity in 3D cultures of differentiating human neural stem cells at 7 months; cells from an  
977 unsupplemented construct. Recorded at 20 frames per sec (fps), video shown at 50fps for 500 frames.

978 **Videos 1-4:** Spontaneous calcium activity in 3D cultures of differentiating human neural stem cells at 3 months; cells from a  
979 fetal ECM containing construct. Recorded at 20 frames per sec (fps), video shown at 50fps for 500 frames.

980 **Videos 1-5:** Spontaneous calcium activity in 3D cultures of differentiating human neural stem cells at 3 months; cells from an  
981 adult ECM containing construct. Recorded at 20 frames per sec (fps), video shown at 50fps for 500 frames.

982 **Videos 1-6:** Spontaneous calcium activity in 3D cultures of differentiating human neural stem cells at 3 months; cells from an  
983 unsupplemented construct. Recorded at 20 frames per sec (fps), video shown at 50fps for 500 frames.

984 **Table 1:** List of genes tested for release in 3D differentiating human neural stem cell cultures.

|         |                                                                   |
|---------|-------------------------------------------------------------------|
| CACNA1D | Voltage-dependent L-type calcium channel subunit alpha-1D         |
| CAMK2G  | Calcium/calmodulin-dependent protein kinase type II subunit gamma |
| DLG4    | Disks large homolog 4                                             |
| EAAT1   | Excitatory amino acid transporter 1                               |
| EAAT2   | Excitatory amino acid transporter 2                               |
| ENO1    | Enolase 1                                                         |
| FABP7   | Fatty Acid Binding Protein 7                                      |
| GABBR1  | Gamma-aminobutyric acid type B receptor subunit 1                 |
| GAD1    | Glutamate decarboxylase 1                                         |
| GFAP    | Glial fibrillary acidic protein                                   |



|          |                                                          |
|----------|----------------------------------------------------------|
| GPHN     | Gephyrin                                                 |
| GRIA1    | Glutamate receptor 1                                     |
| GRIN1    | Glutamate receptor ionotropic, NMDA 1                    |
| KCNB1    | Potassium voltage-gated channel subfamily B member 1     |
| KCND2    | Potassium voltage-gated channel subfamily D member 2     |
| MAP2     | Microtubule associated protein 2                         |
| MEGF10   | Multiple epidermal growth factor-like domains protein 10 |
| NCS1     | Neuronal calcium sensor 1                                |
| NES      | Nestin                                                   |
| PAX6     | Paired box protein Pax-6                                 |
| SCN1A    | Sodium channel protein type 1 subunit alpha              |
| SCN3A    | Sodium channel protein type 3 subunit alpha              |
| SERPINA3 | Peptidase inhibitor Serpina3n                            |
| SOX2     | Transcription factor SOX-2                               |
| Stat3    | Signal transducer and activator of transcription 3       |
| SYN1     | Synapsin 1                                               |
| THBS1    | Thrombospondin 1                                         |
| THBS2    | Thrombospondin 2                                         |
| TNC      | Tenascin                                                 |
| TUBB3    | Beta-III tubulin                                         |

985

986 **Table 2:** List of cytokines tested for release in 3D differentiating human neural stem cell cultures

|        |                                   |
|--------|-----------------------------------|
| ACRP30 | Adiponectin                       |
| BDNF   | Brain-derived neurotrophic factor |
| BMP2   | Bone morphogenetic protein 2      |
| b-NGF  | beta- Nerve growth factor         |

|                |                                                  |
|----------------|--------------------------------------------------|
| bFGF           | Basic fibroblast growth factor                   |
| C5a            | Complement component 5a                          |
| CNTF           | Ciliary neurotrophic factor                      |
| EGF            | Epidermal growth factor                          |
| G-CSF          | Granulocyte-colony stimulating factor            |
| GDNF           | Glial derived neurotrophic factor                |
| GM-CSF         | Granulocyte-macrophage colony-stimulating factor |
| GRO $\alpha$   | Chemokine (C-X-C motif) ligand 1                 |
| ICAM-1         | Intercellular Adhesion Molecule 1                |
| IGF-1          | Insulin growth factor-1                          |
| IL-10          | Interleukin 10                                   |
| IL-1 $\alpha$  | Interleukin 1 alpha                              |
| IL-1 $\beta$   | Interleukin 1 beta                               |
| IL-1ra         | Interleukin-1 receptor antagonist                |
| IL-6           | Interleukin 6                                    |
| IL-8           | Interleukin 8/Chemokine (C-X-C motif) ligand 8   |
| LIF            | Leukemia inhibitory factor                       |
| MCP-1          | Chemokine ligand 2/CCL2                          |
| MIP-1 beta     | Macrophage Inflammatory Protein-1                |
| MIP-1 $\alpha$ | Chemokine ligand 3/CCL3                          |
| MMP-2          | Matrix metalloproteinase 2                       |
| MMP-9          | Matrix metalloproteinase 9                       |
| NT-3           | Neurotrophin-3                                   |
| PDGF-AA        | Platelet growth factor                           |
| RANTES         | Chemokine ligand 5/CCL5                          |
| TGF beta 1     | Transforming growth factor beta 1                |
| TIMP-1         | Tissue inhibitor of matrix metalloproteinase 1   |

|              |                                                |
|--------------|------------------------------------------------|
| TIMP-2       | Tissue inhibitor of matrix metalloproteinase 2 |
| TIMP-4       | Tissue inhibitor of matrix metalloproteinase 4 |
| TNF $\alpha$ | Tumor necrosis factor alpha                    |
| TSP-1        | Thrombospondin 1                               |
| TSP-2        | Thrombospondin 2                               |
| VEGF-A       | Vascular endothelial growth factor A           |

987
